1  
2  
3  
4  
5  
6  
7  
8  
9  
10  
11  
12  
13  
14  
15  
16  
17  
18  
19  
20  
21  
22  
23  
24  
25  
26  
27  
28  
29  
30

## **The *C. elegans* DAF-19M module: a shift from general ciliogenesis to ciliary and behavioral specialization**

Soungyub Ahn<sup>1</sup>, Heeseung Yang<sup>1</sup>, Sangwon Son<sup>1</sup>, Dongjun Park<sup>1</sup>, Hyunsoo Yim<sup>1</sup>, Peter Swoboda<sup>2\*</sup>, Junho Lee<sup>1\*</sup>

<sup>1</sup>Department of Biological Sciences, Institute of Molecular Biology and Genetics, Seoul National University, Seoul, Republic of Korea

<sup>2</sup>Department of Biosciences and Nutrition, Karolinska Institute, Huddinge, Sweden

\*Co-corresponding authors

Junho Lee, Ph.D.

Department of Biological Sciences  
Seoul National University  
Gwanak-ro 1, Gwanak-Gu, 08826, Seoul, Korea  
Telephone +82-2-877-2663  
E-mail: [elegans@snu.ac.kr](mailto:elegans@snu.ac.kr)  
ORCID: 0000-0002-6421-1195

Peter Swoboda, Ph.D.

Department of Biosciences and Nutrition  
Karolinska Institute, Campus Flemingsberg - NEO Building  
Hälsovägen 9, SE-141 83 Huddinge, Sweden  
Telephone: +46-70-260 61 50  
Email: [peter.swoboda@ki.se](mailto:peter.swoboda@ki.se)  
ORCID: 0000-0001-6416-8572

31 **Abstract**

32

33 In animals, cilia are important for the interaction with environments and the proper function of tissues  
34 and organs. Understanding the distinctive identities of each type of ciliated cell is essential for  
35 therapeutic solutions for ciliopathies, complex disorders with impairments of various organs caused  
36 by defective cilia development and function. Here, we report a regulatory module consisting of a  
37 cascade of transcription factors and their target genes that confer the cell type-specific ciliary  
38 identities on the IL2 ciliated neurons in *C. elegans*. We found that DAF-19M, isoform of the sole *C.*  
39 *elegans* RFX transcription factor DAF-19, through X-box promoter motif variants, heads a regulatory  
40 module in IL2 neurons, comprising the core target genes *klp-6* (kinesin), *osm-9* (TRP channel), and  
41 *cwp-4* (novel); under the overall control of terminal selector proteins UNC-86 and CFI-1. Considering  
42 the conservation of this DAF-19M module in IL2 neurons for nictation, a dauer larva-specific  
43 behavior, and in male-specific neurons for mating behavior, we propose the existence of an  
44 evolutionarily adaptable, hard-wired genetic module for distinct behaviors that share the feature  
45 “recognizing the environment.”

46

47 Key words: cilia, RFX transcription factor, DAF-19M, regulatory module, nictation

48

## 49 **Introduction**

50

51       The cilium is a microtubule-based structure that is anchored by the basal body (a modified  
52 centriole). The cilium protrudes from the cell surface like an antenna and thus, is a major cellular  
53 organelle for sensing the environment. Cilia can be categorized into two types: motile and non-motile  
54 cilia (also known as primary cilia). In humans, primary cilia sense and transmit signals to and from  
55 the immediate cell environment, while motile cilia provide rhythmic motion to move extracellular  
56 fluids or small particles across the cell surface (Anvarian *et al*, 2019; Mitchison & Valente, 2017;  
57 Nachury & Mick, 2019; Reiter & Leroux, 2017). Primary cilia have received widespread attention  
58 because they are present nearly ubiquitously on many different cell types in various tissues. Cilia  
59 regulate cellular processes in multiple organs, such as the brain, kidney, retina, liver, or the skeletal  
60 system (Mitchison & Valente, 2017). As such, sensing the environment by and information transfer  
61 through cilia are key cellular processes for the proper function of tissues and organs. Failure of cilia  
62 formation or proper cilia function can lead to a variety of ciliopathies, diseases in which the  
63 development and homeostasis of typically multiple organs are impaired. Ciliopathies that affect the  
64 nervous system result in distinct phenotypes and disorders, including brain malformations, cognitive  
65 impairment, and mental disorders of various strengths (Reiter & Leroux, 2017).

66       Because ciliopathies are often complex disorders and may present different phenotypes in  
67 different tissues, including in the nervous system, the study of individual or a small group of ciliated  
68 cells is essential for understanding exact molecular mechanisms and symptoms of a given ciliopathy.  
69 Utilizing an appropriate animal model is one way to overcome the inherent complexity of ciliopathies.  
70 The worm *Caenorhabditis elegans* is a useful model to study neuronal cilia thanks to the presence of  
71 ciliated sensory neurons and the overall simplicity of its nervous system (Inglis *et al*, 2007; White *et*  
72 *al*, 1986). Even though ciliated sensory neurons have the common identity to sense and transmit  
73 external signals through cilia, each one or even a small group of these neurons is also expected to  
74 have a unique identity to reflect its specific sensory modality and behavioral task, its interconnected  
75 position within the nervous system, and its spatiotemporal development and “final” position in the  
76 animal. The powerful genetics of *C. elegans* are ideally suited for the discovery of (upstream)  
77 regulators that determine the functional identity of an individual or a small group of ciliated sensory

78 neurons (Etchberger *et al*, 2009; Etchberger *et al*, 2007; Inglis *et al.*, 2007; Mukhopadhyay *et al*,  
79 2007; Wang *et al*, 2010; Zhang *et al*, 2014).

80 To function as a sensory organelle and signal transducer, the fine-tuning of development and the  
81 maintenance of ciliary structure are essential. RFX transcription factors (TFs) are well known key  
82 regulators for the process of ciliogenesis (Choksi *et al*, 2014; Senti & Swoboda, 2008; Swoboda *et al*,  
83 2000). The role of RFX TFs is to initiate and to maintain the regulation of genes for general ciliary  
84 structure and function; in a variety of cell types and tissues including in the nervous system; in a  
85 number of different organisms including in humans (Piasecki *et al*, 2010). Mammalian genomes  
86 encode RFX TF gene families (paralogs) and several of these paralogs play important roles during  
87 neuron development in several regions of the brain (Lemeille *et al*, 2020; Sugiaman-Trapman *et al*,  
88 2018). RFX TFs are defined by a certain type of DNA binding domain (DBD) and some have a  
89 dimerization domain (DIM) (Emery *et al*, 1996a; Gajiwala *et al*, 2000; Sugiaman-Trapman *et al.*,  
90 2018). RFX TFs recognize and bind to a *cis*-regulatory DNA sequence motif, the X-box motif,  
91 typically in promoters of direct target genes that are involved in the development and maintenance of  
92 cilia. X-box motif sequences are imperfect inverted repeats, consisting of two 6-nucleotides half sites  
93 separated by spacer nucleotides (GTNRCC N<sub>1-3</sub> RGYAAC), to which RFX TFs can bind as homo- or  
94 hetero-dimers (Emery *et al*, 1996b; Gajiwala *et al.*, 2000; Jolma *et al*, 2013).

95 This setup – RFX TF, X-box promoter motif, direct ciliary target gene – was first discovered in  
96 *C. elegans* (Swoboda *et al.*, 2000). The *C. elegans* genome contains only one RFX TF gene, *daf-19*,  
97 which encodes several isoforms that govern different, yet in parts related biological functions. DAF-  
98 19A/B protein regulates synaptic homeostasis in non-ciliated neurons and DAF-19C regulates the  
99 developmental process of ciliogenesis in sensory neurons (De Stasio *et al*, 2018; Senti & Swoboda,  
100 2008; Swoboda *et al.*, 2000). Cilia and synapses share important conceptual and anatomical parallels  
101 in connection to their biological tasks as signal transducers (Shaham, 2010). DAF-19M regulates male  
102 mating behavior through a small group of specialized, male specific neurons that are ciliated and in  
103 which *daf-19m* is specifically expressed: CEM, RnB, and HOB (Wang *et al.*, 2010). This particular  
104 group of ciliated neurons is thus a very good example for understanding how unique ciliary identities  
105 and functional specializations are attained, shaped and maintained.

106 Interestingly, *daf-19m* is also expressed in the six IL2 ciliated sensory neurons that are not sex-  
107 specific in the head of *C. elegans* (Wang *et al.*, 2010). These neurons govern a very specific worm  
108 behavior, important for survival, nictation. Nictating worms wave their heads while standing on their  
109 tails (Cassada & Russell, 1975; Reed & Wallace, 1965). During the *C. elegans* life cycle, only dauer  
110 larvae, a juvenile diapause stage that is resistant to harsh environmental conditions, can nictate  
111 (Cassada & Russell, 1975). Nictation enables dauer larvae worms to latch on to carrier animals and  
112 get transported over long distances in search for more favorable environmental conditions (e.g. more  
113 food). In a previous study, we have determined that IL2 neurons, their intact, functional cilia and  
114 cholinergic neurotransmission are essential for nictation behavior (Lee *et al.*, 2012). For all ciliated  
115 sensory neurons, including the IL2 neurons, general ciliary identity and functionality is regulated by  
116 DAF-19C, while the regulation of IL2 specific ciliary identity and specialization in connection to one  
117 dedicated behavior, nictation, has not been identified yet.

118 In this study, we have adopted a genetic screen to identify mutant animals with defective  
119 expression of an IL2 neuron specific identity gene, *klp-6*, encoding a ciliary kinesin (Peden & Barr,  
120 2005). We found that *daf-19m* encodes a regulator of IL2 neuron specific ciliary identity, but not of  
121 non-ciliary identity features or characteristics. DAF-19M protein heads a functional module or  
122 regulatory subroutine comprising direct IL2 neuron ciliary target genes like *klp-6* (kinesin) or *osm-9*  
123 (TRPV channel) (Colbert *et al.*, 1997; Peden & Barr, 2005; Wang *et al.*, 2010). The proper function of  
124 this DAF-19M module is essential for the IL2 neuron controlled behavioral output, nictation. DAF-  
125 19M exerts its regulation by recognizing and binding to novel X-box motif variant sequences in the  
126 promoters of its direct target genes, while *daf-19m* itself is regulated by upstream terminal selectors,  
127 the TFs UNC-86 and CFI-1, which govern a number of aspects of terminal, functional differentiation  
128 of IL2 neurons (Zhang *et al.*, 2014). Finally, we have used our in-depth knowledge of this regulatory  
129 cascade, the IL2 neuron DAF-19M module regulating direct targets through X-box motif variants, to  
130 search and find *C. elegans* genome-wide a large number of the novel, additional candidate genes that  
131 may contribute to generating the behavioral output of this module, nictation. The molecular identities  
132 of this novel set of genes will allow uncovering the mechanistic underpinnings of nictation.

133

134 **Results**

135

136 The gene *daf-19* encodes a regulator protein for IL2 neuron identity and functionality

137 The genes *klp-6* and *osm-3* encode kinesin motor proteins that are important for sensory cilia  
138 structure and function in IL2 and male specific neurons (Morsci & Barr, 2011; Peden & Barr, 2005).  
139 While – in both sexes – *osm-3* is expressed in many different types of ciliated sensory neurons  
140 including IL2 neurons, *klp-6* is specifically expressed only in IL2 neurons. In males, *klp-6* is also  
141 expressed in certain male specific ciliated sensory neurons. *klp-6* can thus be considered as an IL2  
142 neuron identity gene (Wang *et al.*, 2010; Zhang *et al.*, 2014). Mutations in *klp-6* cause defects in the  
143 sensory behavior of nictation, governed by the IL2 neurons (Lee *et al.*, 2012).

144 To find upstream regulators of IL2 neuron identity, we performed a forward genetic screen using a  
145 *klp-6* transcriptional GFP fusion (*klp-6p::gfp*) as a marker for IL2 neurons. We treated worms from  
146 the transgene insertion line *jlls1900* with the mutagen Ethyl methane sulfonate (EMS). The line  
147 *jlls1900* carries both *klp-6p::gfp* and *aqp-6p::dsRed*, a marker for IL1 neurons. During development,  
148 IL1 and IL2 neurons differentiate from a common progenitor (Sulston *et al.*, 1983). Therefore, to  
149 exclude mutations affecting the common progenitor of IL1 and IL2 neurons, we focused on isolating  
150 mutants with strongly decreased *klp-6p::gfp* expression in IL2 neurons that at the same time maintain  
151 intact *aqp-6p::dsRed* expression in IL1 neurons. We isolated EMS treated mutant worms using the  
152 COPAS BIOSORT (Fig 1A). From a screen of >15,000 F1 animals, we were able to isolate and  
153 maintain two mutations, both of which locate to the gene *daf-19* (Fig 1B): the *of3* allele locates to the  
154 dimerization domain (DIM), while the *of4* allele locates to the DNA binding domain (DBD) (De  
155 Stasio *et al.*, 2018; Swoboda *et al.*, 2000; Wang *et al.*, 2010). Both mutations *of3* and *of4* cause  
156 strongly decreased *klp-6* expression (Fig 1C), fluorescent dye filling defects (Fig 1E) and a dauer  
157 constitutive phenotype (Daf-c). In genetic rescue experiments with a transgenic fosmid construct  
158 carrying wild-type *daf-19* (*jIEx1902*), all of these *daf-19* mutant phenotypes were restored, including  
159 prominent *klp-6* expression (Fig 1D and E). Additionally, we were able to recapitulate decreased *klp-6*  
160 expression in other *daf-19* mutant backgrounds (Fig EV1A). Importantly, IL2 neurons differentiate  
161 normally and their cell bodies and neurites are intact in a *daf-19* mutant background. Using a  
162 transcriptional GFP fusion to the *daf-19* independent IL2 gene *F28A12.3* as a marker

163 (*F28A12.3p::gfp*) (Phirke *et al.*, 2011), we could demonstrate intact expression in IL2 cell bodies and  
164 neurites (Fig EV1B), while cilia structure was still disrupted in a *daf-19(rh1024)* mutant background  
165 as these animals were still fluorescent dye filling defective.

166 In summary, we conclude that the new *daf-19* mutations *of3* and *of4* affect the expression of *klp-6*  
167 in IL2 neurons, IL2 sensory cilia development, and dauer formation, but not IL2 neuronal cell fate and  
168 its general differentiation into a neuron.

169

#### 170 Identification of a cis-regulatory element, an X-box motif variant, controlling *klp-6* expression

171 RFX transcription factors (TFs), including *C. elegans* DAF-19 protein, regulate gene expression by  
172 binding to X-box promoter motifs. However, a previous study reported that the *klp-6* promoter region  
173 lacks a canonical X-box motif (Fig EV2A) (Peden & Barr, 2005). Therefore, we systematically  
174 dissected the *klp-6* promoter region to find a cis-regulatory, presumed binding target for DAF-19  
175 regulation. We created a series of *klp-6* promoter deletions and truncations that we fused to GFP as a  
176 marker for IL2 neurons in transgenesis experiments (Fig 2A). The overlapping transgene constructs  
177 *klp-6p (-614, -1)::gfp* and *klp-6p (-1048, -600)::gfp* showed intact expression in IL2 neurons  
178 indicating that the minimal region from -614 to -600 of the *klp-6* promoter is highly relevant for  
179 proper *klp-6* expression. Intriguingly, this region is similar to canonical X-box motifs, yet displays  
180 distinct deviations from canonical *C. elegans* X-box motif sequences (Fig 2B, EV2A and B, and  
181 Table EV2 and EV3; see also Materials and Methods). Therefore, we call this *klp-6* promoter cis-  
182 regulatory element an X-box motif variant.

183 We mutagenized this X-box motif variant to investigate in transgenesis experiments its necessity  
184 for *klp-6* expression (Fig 2B and C). When we interfered with the 5' half site of the X-box motif  
185 variant, *klp-6* expression decreased drastically. For example, only 1 of 3 transgenic lines of the  $\Delta$  (-  
186 614, -608) construct showed weak *klp-6* expression in some IL2 neurons, while in 2 of 3 lines *klp-6*  
187 expression was absent. In contrast, interfering with the 3' half site did not significantly affect *klp-6*  
188 expression in IL2 neurons. Only some transgenic animals showed expression in a reduced number of  
189 IL2 neurons, while most of the transgenic animals showed entirely intact expression. Importantly, the  
190 overall intensity of *klp-6* expression remained uniformly strong. We conclude that the 5' half site of  
191 the X-box motif variant is more critical for *klp-6* expression than its 3' half counterpart. An inversion



192 of the full *kfp-6* X-box motif variant did not affect *kfp-6* expression in IL2 neurons, as also the *kfp-6*  
193 X-box motif variant, like canonical X-box motifs, is an imperfect inverted repeat sequence.

194 We then cloned tandem repeats of the *kfp-6* X-box motif variant into the pPD95.77 GFP vector to  
195 investigate in transgenesis experiments whether this motif is also sufficient for *kfp-6* expression (Fig  
196 2D and E). Tandem repeats of the 5' half site (*Tandem 3x (-614, -608)::gfp*) did not elicit GFP  
197 expression in IL2 neurons. In contrast, tandem repeats of the full X-box motif variant (*Tandem 3x (-*  
198 *614, -602)::gfp*) or of an extended X-box motif variant (*Tandem 3x (-628, -590)::gfp*) were able to  
199 elicit (often weak) GFP expression in IL2 neurons. We noted that in some cases the extended X-box  
200 motif variant was able to elicit entirely intact GFP expression in all six IL2 neurons (Fig 2E).

201 Like other genes that are (specifically) expressed in IL2 neurons in both sexes, *kfp-6* is also  
202 expressed in the CEM, HOB and RnB male specific neurons (Peden & Barr, 2005; Wang *et al.*,  
203 2010). And like is the case for IL2 neurons, the minimal region from -614 to -600 of the *kfp-6*  
204 promoter was necessary for male specific neuronal expression of *kfp-6* (Fig EV2C). Likewise, a  
205 transgene construct carrying the extended X-box motif variant (*Tandem 3x (-628, -590)::gfp*) was able  
206 to elicit (often weak) GFP expression in the CEM, HOB and RnB neurons (Fig EV2D).

207 Together, these results demonstrate and support the conclusion that the *kfp-6* X-box motif variant is  
208 both necessary and sufficient for regulating gene expression not only in IL2 but also in male specific  
209 neurons. Accordingly, and underscoring its importance for regulating *kfp-6* expression, the *kfp-6* X-  
210 box motif variant is well conserved in other *Caenorhabditis* species like in *C. briggsae* and in *C.*  
211 *brenneri* (Fig EV2B).

212

### 213 The protein isoform DAF-19M regulates genes in IL2 neurons through the X-box motif variant

214 The expression of *kfp-6* is restricted to IL2 and male specific neurons (Peden & Barr, 2005). To  
215 investigate whether DAF-19 regulates *kfp-6* expression in IL2 neurons by itself or together with co-  
216 factor(s), we carried out a yeast-1-hybrid (Y1H) screening experiment. Using the extended *kfp-6*  
217 promoter X-box motif variant sequence as bait, we isolated 119 independent yeast colonies, each  
218 representing an independent binding event. 114 of 119 yeast colonies carried cDNA constructs that  
219 resulted in DAF-19 protein binding to the bait sequence (Table EV1). We confirmed the molecular



220 identity of the underlying cDNA constructs from all 119 colonies in all cases by PCR and in a few  
221 cases by sequencing. We note that all presently known isoforms of DAF-19 (A/B, C, M) share exactly  
222 the same DNA binding domain (DBD) (De Stasio *et al.*, 2018; Senti & Swoboda, 2008; Swoboda *et*  
223 *al.*, 2000; Wang *et al.*, 2010). This heterologous Y1H experiment does therefore not allow  
224 distinguishing which isoform binds to the *klp-6* promoter X-box motif variant. Our Y1H results  
225 indicate, however, that in all likelihood DAF-19 regulates *klp-6* expression without a co-factor.

226 *klp-6p::gfp* transgene expression is strongly decreased or absent in *daf-19* mutant backgrounds that  
227 affect all the isoforms, or affect the *daf-19c* or the *daf-19m* isoforms, but is entirely intact in a *daf-*  
228 *19a/b* specific mutant background (Fig EV1A) (Wang *et al.*, 2010). Similar observations were made  
229 for other genes specifically expressed in IL2 neurons (De Stasio *et al.*, 2018; Wang *et al.*, 2010). To  
230 investigate which DAF-19 isoform regulates gene expression in IL2 neurons through the *klp-6*  
231 promoter X-box motif variant, we carried out transgenic rescue experiments determining GFP  
232 expression of the extended X-box motif variant construct (*Tandem 3x (-628, -590)::gfp*) (Fig 3A and  
233 B, EV4A). A transgene construct containing *daf-19c* was not able to restore GFP expression, while a  
234 construct containing *daf-19m* did restore GFP expression in IL2 neurons, albeit only partially.  
235 Providing both *daf-19m* and *daf-19c* restored GFP expression even further, nearly to wild-type levels,  
236 both with regard to IL2 cell numbers and GFP intensity (Fig 3A and B). We conclude that primarily  
237 the isoform DAF-19M is necessary for IL2 neurons gene expression through the X-box motif variant,  
238 while DAF-19C provides supporting function.

239 Next, we investigated whether other genes specifically expressed in IL2 neurons, and highly  
240 relevant for IL2 ciliary functionality, were also regulated by DAF-19M (Fig 3C and D). In previous  
241 studies, *osm-9* (encoding a ciliary TRPV channel), *cwp-4* (a novel gene encoding a protein with a  
242 PTS/mucin domain), *cil-7* (encoding a myristolated protein localizing to cilia), and *tba-6* (encoding an  
243 alpha-tubulin), have been reported to be expressed in IL2 and male specific neurons (Colbert *et al.*,  
244 1997; Hurd *et al.*, 2010; Maguire *et al.*, 2015; Portman & Emmons, 2004). The expression of *osm-9*,  
245 *cwp-4*, and *cil-7* was restored in IL2 neurons in transgenic *daf-19m* rescue experiments, while *tba-6*  
246 expression was *daf-19m* independent. *daf-19m* rescue of *osm-9* expression was strong, while rescue of  
247 *cwp-4* and *cil-7* expression, respectively, was weaker and not statistically significant: it allowed for  
248 only partial expression in some of the six IL2 neurons (Fig 3D).

249 To investigate whether the DAF-19M mediated regulation of this (mostly ciliary) gene expression  
250 occurs through an X-box motif variant as in *klp-6*, we searched for similar sequence motifs in the  
251 genes *osm-9*, *cwp-4*, and *cil-7*. Within and directly up- and downstream (5' and 3') of the gene *osm-9*,  
252 we were so far unable to find a sequence hit that resembles the *klp-6* X-box motif variant (Colbert *et*  
253 *al.*, 1997). The promoter region of *cil-7* harbors such a sequence hit similar to *klp-6*, which, however,  
254 is not conserved in other *Caenorhabditis* species (from Wormbase; [www.wormbase.org](http://www.wormbase.org)).  
255 Interestingly, a highly similar doublet of the *klp-6* X-box promoter motif variant exists in the *cwp-4*  
256 promoter region (Fig 3E): located at -90 to -78 and at -68 to -55 upstream of the start codon ATG.  
257 These *C. elegans cwp-4* X-box variants are well conserved in other *Caenorhabditis* species, like in the  
258 orthologous *cwp-4* promoter regions of *C. briggsae*, *C. remanei*, *C. brenneri*, and *C. japonica* (Fig  
259 EV3A). We mutated these X-box motif variant sequences in the *cwp-4* promoter and investigated in  
260 transgenesis experiments their necessity for *cwp-4* expression. We found that *cwp-4* expression was  
261 entirely absent upon motif mutation, both in IL2 neurons (Fig 3E and F) as well as in the CEM, HOB  
262 and RnB; male specific neurons (Fig EV3B). We have thereby confirmed the concept of DAF-19M  
263 regulating gene expression through an X-box motif variant for at least two genes, *klp-6* and *cwp-4*.

264

#### 265 DAF-19M heads a regulatory subroutine in IL2 neurons

266 Terminal selectors, which initiate the terminal differentiation of neurons, confer and maintain  
267 neuronal identities (Hobert, 2011, 2016). The genes *unc-86* and *cfi-1* encode such terminal selectors  
268 that confer and maintain specific identities in IL2 neurons, like being cholinergic or being ciliated  
269 sensory neurons (Zhang *et al.*, 2014). Since DAF-19M regulates a number of genes important for  
270 proper IL2 function, we wondered whether the gene *daf-19m* itself is a member of the IL2 neuron  
271 terminal selector group headed by UNC-86 and CFI-1, and thus, whether expression of *daf-19m* is  
272 dependent on these terminal selectors. The expression of *klp-6* was reduced significantly in IL2  
273 terminal selector mutant backgrounds (Zhang *et al.*, 2014). And similar to *klp-6*, the expression of  
274 *daf-19m* was absent in *unc-86(n846)*, and strongly reduced in *cfi-1(ky651)* mutant backgrounds (Fig  
275 4A and B).

276 We then examined two IL2 identity genes that are part of the same UNC-86 and CFI-1 terminal  
277 selector group, but whose gene products are not connected to IL2 ciliary functionality: *lag-2*

278 (encoding a notch receptor ligand that is expressed in IL2 neurons in dauer larvae) and *unc-17*  
279 (encoding a protein involved in IL2 cholinergic synaptic transmission) (Ouellet *et al*, 2008; Rand,  
280 1989; Zhang *et al.*, 2014). The expression of *lag-2* and *unc-17* was unchanged between wild type and  
281 *daf-19(n4132)*, the *daf-19m* specific mutant background (Fig 4C and D). These results suggest that  
282 within the UNC-86 and CFI-1 terminal selector group, DAF-19M heads a regulatory subroutine  
283 consisting of IL2 identity genes with relevant ciliary functionality (Fig 3C and D), while non-ciliary  
284 IL2 identity genes are *daf-19m* independent (Fig 4C and D).

285 A regulatory subroutine can be regarded as a defined module, which as an entity forms part of a  
286 terminal selector group. Such a subroutine module consists of a TF (which itself may directly be  
287 regulated by the terminal selectors heading the group) and its direct downstream or effector genes,  
288 which then confer specific neuronal identities to terminally differentiating neurons (Altun-Gultekin *et*  
289 *al*, 2001; Etchberger *et al.*, 2007; Gordon & Hobert, 2015; Hobert, 2008, 2016). We examined  
290 whether *daf-19m* is directly regulated by the terminal selectors and TFs UNC-86 and CFI-1. We first  
291 determined candidate binding sites for both UNC-86 and CFI-1 in the *daf-19m* promoter region (Fig  
292 EV4B). We then generated substitution mutations in defined candidate UNC-86 and CFI-1 binding  
293 sites in a *daf-19mp::gfp* expression construct and examined the resulting transgenic GFP expression  
294 patterns in IL2 neurons. Only mutations in certain binding sites for both UNC-86 and CFI-1 (-601 to -  
295 566; -132 to -116) reduced the GFP expression in IL2 neurons: typically four instead of six IL2  
296 neurons still expressed GFP with strong intensity (Fig 4E and F), thereby partially phenocopying *daf-*  
297 *19m* expression in a *cfi-1* mutant background (Fig 4A and B) (Zhang *et al.*, 2014). These results  
298 suggest that both multiple UNC-86 and CFI-1 binding sites (-601 to -566) and multiple CFI-1 binding  
299 sites (-132 to -116) are essential for *daf-19m* expression.

300 DAF-19M is thus the TF heading a regulatory subroutine for IL2 neuron ciliary functionality and is  
301 directly regulated by the terminal selectors and TFs UNC-86 and CFI-1. We note that the DAF-19M  
302 regulatory subroutine appears to maintain activity even after (embryonic) IL2 neuron development  
303 and differentiation is complete, as *daf-19m* and its downstream genes continue to be prominently  
304 expressed in IL2 neurons post-development and differentiation during the L1 and dauer larval stages  
305 (Fig EV1C and EV3C).

306

### 307 The DAF-19M regulatory subroutine controls nictation behavior

308 In a previous study, we reported that cilia structure and function, as well as synaptic transmission in  
309 IL2 neurons, are essential for nictation behavior (Lee *et al.*, 2012). In particular, *klp-6* and *osm-9*  
310 mutants that have defective IL2 cilia structure, show reduced nictation ratios. DAF-19M regulates *klp-*  
311 *6* and *osm-9* in IL2 neurons (Fig 3C and D) (Wang *et al.*, 2010), and thus, we hypothesized that  
312 mutations in *daf-19m* would also impact nictation behavior.

313 In a series of experiments, we determined nictation ratios for various *daf-19* mutants and for  
314 mutants in IL2 genes with relevant ciliary functionality (Fig 5). Unfortunately, it proved technically  
315 impossible to determine nictation ratios for *daf-19(m86)*, the null mutant affecting all *daf-19* isoforms,  
316 as *daf-19(m86)* dauers move very little. *daf-19(tm5562)*, a *daf-19a/b* isoform specific mutant, did not  
317 show a significant nictation defect (Fig 5A). Of note, in the *daf-19(tm5562)* mutant background the  
318 expression of *klp-6* is fully intact (Fig EV1A). On the other hand, *daf-19(n4132)* and *daf-19(sm129)*,  
319 two different *daf-19m* isoform specific mutants, showed clear nictation defects (Fig 5A and B). Next,  
320 in genetic rescue experiments, we attempted to restore the nictation defects of the *daf-19m* isoform  
321 specific mutant, *daf-19(n4132)*. Providing *daf-19m* as a transgene was not sufficient to rescue the *daf-*  
322 *19(n4132)* nictation defects, while providing the direct *daf-19m* downstream genes *osm-9*, *klp-6* and  
323 *cwp-4* as transgenes did enable the rescue of nictation defects (Fig 5C). We then examined mutants of  
324 other direct *daf-19m* downstream genes (Fig 5D and E): *cwp-4(tm727)* and *osm-9(yz6)* mutants clearly  
325 showed significantly reduced nictation ratios, while *cil-7(tm5848)* mutants did not. *cil-7* mutants only  
326 showed nictation defects in a *cil-7; klp-6* double mutant background as both *cil-7(tm5848); klp-*  
327 *6(ys71)* and *cil-7(tm5848); klp-6(ys72)* showed significantly reduced nictation ratios.

328 We conclude that *klp-6*, *osm-9* and *cwp-4*, direct *daf-19m* downstream genes in IL2 neurons,  
329 encode key proteins highly relevant for nictation behavior, strongly suggesting that the DAF-19M  
330 regulatory subroutine is crucial for enabling nictation behavior through IL2 neuron function.

331

### 332 Predicting additional DAF-19M downstream genes with an X-box promoter motif variant

333 We hypothesized that additional and novel genes, candidates for also being involved in nictation  
334 governed by IL2 neurons, might also be regulated by DAF-19M through an X-box motif variant. To

335 search for such additional and novel members of the DAF-19M subroutine throughout the *C. elegans*  
336 genome, we used the *klp-6* and *cwp-4* X-box motif variants and very similar sequences as search tools  
337 (see Materials and Methods for details). We built position weight matrices (PWMs) of both X-box  
338 motif variants and of *C. elegans* canonical X-box motifs for reference, including in both cases a  
339 number of experimentally proven X-box motifs (Fig 2B, EV2A and B, EV3A, Table EV2 and EV3).  
340 We used both PWMs to carry out searches throughout the *C. elegans* genome. In these genome-wide  
341 searches, we allowed the 1-3 spacer nucleotide(s) to be N, NN or NNN, as in a variety of species,  
342 including in *C. elegans*, the (vast) majority of X-box motifs contains a double nucleotide spacer,  
343 while single and triple nucleotide spacer sequences have also been found. As expected in all our  
344 genome-wide searches (given the complexities of the respective query sequence PWMs and the  
345 overall similarities versus differences between canonical X-box motifs and X-box motif variants), we  
346 found large numbers of X-box candidate hits (>75.000). In particular in searches using NN double  
347 nucleotide spacers, the search output contained a number of hits of already experimentally proven X-  
348 box motifs of ciliary genes, strongly validating our overall search strategy (Table EV4, EV5, and  
349 EV6). To focus on candidate X-box hits as part of a DAF-19M regulatory subroutine in IL2 neurons,  
350 we sorted and filtered for potential promoter motifs, by firstly requiring the candidate motif hit to  
351 locate within 1 kb of the nearest start codon ATG of a given gene and secondly requiring these  
352 candidate genes to have a suspected or experimentally demonstrated expression pattern that included  
353 IL2 neurons (as extracted from Wormbase, version WS235; [www.wormbase.org](http://www.wormbase.org)). The search results  
354 then yielded 62 genes for the X-box motif variant PWM with a single spacer nucleotide N as query,  
355 97 genes for the PWM with double spacer nucleotides NN, and 66 genes for the PWM with triple  
356 spacer nucleotides NNN (Table EV4, EV5, and EV6). We anticipate that these gene lists contain  
357 significant numbers of novel candidate members of the DAF-19M regulatory subroutine in IL2  
358 neurons. Ongoing and future work will determine DAF-19M dependent gene expression in IL2  
359 neurons, mutant analyses involvement in IL2 governed nictation, and molecular characterization of  
360 encoded protein function will provide mechanistic insight into how nictation behavior is generated  
361 and then executed by the worm.

362

## 363 Discussion

364

365 RFX transcription factors (TFs), by binding to X-box motifs in promoters of general ciliary genes,  
366 regulate the developmental process of ciliogenesis (Choksi *et al.*, 2014). First demonstrated for DAF-  
367 19, the *C. elegans* RFX TF (Swoboda *et al.*, 2000), this finding was subsequently replicated in many  
368 different organisms, including mammals (Choksi *et al.*, 2014; Piasecki *et al.*, 2010). The gene *daf-19*  
369 encodes several different protein isoforms that regulate different biological functions in addition to  
370 ciliogenesis (De Stasio *et al.*, 2018; Senti & Swoboda, 2008; Wang *et al.*, 2010; Wells *et al.*, 2015; Xie  
371 *et al.*, 2013). In this study, we have focused on the role of the protein isoform DAF-19M, which heads  
372 a functional module (or regulatory subroutine) controlling organismal behaviors, like male mating  
373 (Wang *et al.*, 2010) and nictation (this work). Interestingly, the regulation of this DAF-19M module  
374 goes through an X-box motif variant, which mediates the expression in IL2 neurons of crucially  
375 important genes for nictation, like *klp-6* and *cwp-4*. X-box motifs are imperfect inverted 6-nucleotides  
376 repeat sequences separated by 1-3 spacer nucleotides (Blacque *et al.*, 2005; Chen *et al.*, 2006;  
377 Efimenko *et al.*, 2005; Emery *et al.*, 1996b). Very often the X-box spacer nucleotides are AT, as is the  
378 case for most *C. elegans* ciliary genes regulated by the ciliogenic DAF-19C protein isoform (Blacque  
379 *et al.*, 2005; Burghoorn *et al.*, 2012; Efimenko *et al.*, 2005). Here, we have uncovered a shorter X-box  
380 motif variant with only a 1-nucleotide spacer T. Also, compared to canonical *C. elegans* X-boxes, this  
381 variant appears to be less stringently conserved at crucial motif positions (Gajiwala *et al.*, 2000) as  
382 well as with regard to positioning within promoter regions upstream of gene starting codons (ATG)  
383 (Burghoorn *et al.*, 2012). These aspects may have precluded the discovery of such an X-box motif  
384 variant in previous, quite stringently constructed X-box motif search efforts (Blacque *et al.*, 2005;  
385 Burghoorn *et al.*, 2012; Chen *et al.*, 2006; Efimenko *et al.*, 2005). Using expression assays employing  
386 *klp-6* and *cwp-4*, two genes crucial for ciliary functionality of IL2 neurons, we have shown that the X-  
387 box motif variant is both necessary and sufficient for expression in IL2 neurons, and in male specific  
388 neurons. Thereby, the X-box motif variant proves essential for nictation behavior and possibly also  
389 for male mating. It thus provides an important entry point into uncovering the molecular mechanisms  
390 that govern behaviors like nictation and male mating through functional modules like the one headed  
391 by DAF-19M (Fig 6).



392 Our work also features a general aspect that may be highly relevant for other experimental systems.  
393 We have demonstrated that small shifts in TF binding motif sequence conservation or lack thereof,  
394 from canonical X-box motif to X-box motif variant, can have functional consequences, from  
395 governing general ciliary functionality to cell-specific ciliary specializations and behavioral output.  
396 These shifts may thus provide molecular mechanisms for how to adopt new biological functions step-  
397 by-step.

398 How does DAF-19M through binding to the X-box motif variant regulate the expression of its  
399 target genes in IL2 neurons? Our Y1H results do not distinguish which of the DAF-19 protein  
400 isoforms binds to the X-box motif variant sequence. DAF-19 protein isoforms differ only by their N-  
401 terminal amino acid sequences, while central and C-terminal sequences, including crucial functional  
402 domains like DBD and DIM are identical between all the isoforms (Senti & Swoboda, 2008; Wang *et al.*,  
403 *et al.*, 2010). In the IL2 ciliated neurons, both gene isoforms *daf-19c* and *daf-19m* are expressed, while  
404 *daf-19a/b* is expressed in the nervous system specifically in non-ciliated neurons (De Stasio *et al.*,  
405 2018; Senti & Swoboda, 2008; Wang *et al.*, 2010). DAF-19C and DAF-19M differ by only a few N-  
406 terminal amino acids, while the C-terminal 611 amino acids are identical. DAF-19M has 11 N-  
407 terminal amino acids not shared with DAF-19C, while DAF-19C has 50 or 27 N-terminal amino acids  
408 not shared with DAF-19M (depending on starting in exon 4 or 5, respectively) (from Wormbase;  
409 [www.wormbase.org](http://www.wormbase.org)). In our genetic rescue experiments, we have determined that in IL2 neurons  
410 DAF-19M can regulate the expression of its ciliary target genes *klp-6* and *cwp-4*, while DAF-19C by  
411 itself cannot. This DAF-19M mediated rescue is incomplete though, but can be elevated to nearly  
412 wild-type levels by supplying also DAF-19C. This indicates that in IL2 neurons DAF-19M can bind  
413 to X-box motif variant sequences as homo-dimer, albeit inefficiently, while DAF-19C supported  
414 hetero-dimers with DAF-19M elevate this binding efficiency to (functionally) nearly wild-type levels.  
415 How then is binding accomplished and distinguished, respectively, between canonical X-boxes in  
416 promoters of general ciliary genes (DAF-19C targets) and X-box motif variants in promoters of genes  
417 for functional ciliary specializations like *klp-6* and *cwp-4* (primarily targets of DAF-19M supported  
418 by DAF-19C), given that both types of target genes, and both *daf-19c* and *daf-19m*, are all expressed  
419 in IL2 ciliated neurons? One possibility is that the (slight) differences in N-terminal amino acids  
420 between DAF-19C and DAF-19M might affect 3-D protein (TF) structure and thereby impact binding  
421 affinities to canonical X-boxes versus X-box motif variants. Alternatively, and possibly more likely,



422 IL2 neuron specific protein co-factors (activators and/or inhibitors) might impact the ability of  
423 binding to canonical X-boxes versus X-box motif variants, respectively. Such a co-factor scenario has  
424 been proposed for the impact DAF-19 has on the serotonin neurotransmitter biosynthesis pathway in  
425 the ADF ciliated neurons, even though in that case no X-boxes or variants have hitherto been found in  
426 the promoters of serotonin pathway genes (Xie *et al.*, 2013). Co-factors might also be involved in  
427 modulating the activities of RFX TF paralogs in mammals, where it was found in the mouse that the  
428 RFX1-3 paralogs can regulate the same or different sets of (ciliary) target genes depending on cellular  
429 context, but without dedicated specificity between the respective RFX TF paralog (1, 2 or 3) and the  
430 sequence composition of a given X-box motif (Lemeille *et al.*, 2020). In the future, it will be  
431 interesting to examine the interactions between DAF-19M and DAF-19C (and X-box motif variants)  
432 using microscopy-based techniques such as BiFC, BRET or *in vitro* affinity assays (Bhuckory *et al.*,  
433 2019; Lai & Chiang, 2013), so as to gain mechanistic insight into how the IL2 neuron specific DAF-  
434 19M functional module initiates and operates.

435 The TFs UNC-86 and CFI-1 have previously been described as terminal selectors for IL2 neurons  
436 as they confer, regulate and maintain specific (anatomical and molecular) identities that are  
437 characteristic for terminally differentiated, functional IL2 neurons (Zhang *et al.*, 2014). We have  
438 shown that DAF-19M is a constituent of the UNC-86/CFI-1 terminal selector group. Both TFs  
439 directly regulate DAF-19M through defined binding sites in the *daf-19m* promoter. In turn, DAF-19M  
440 through the X-box motif variant then directly regulates its IL2 neuron specific target genes and  
441 thereby heads a regulatory subroutine within the UNC-86/CFI-1 terminal selector group. Given the  
442 molecular identities of DAF-19M and its direct target genes this regulatory subroutine can be defined  
443 as a functional module concerning IL2 neuron ciliary functionality (Fig 6A and B).

444 What is the biological role of the DAF-19M regulatory subroutine (or functional module) in IL2  
445 neurons considering the molecular identities and functions of the DAF-19M direct target genes? *klp-6*  
446 encodes a specialized ciliary kinesin motor protein, which is expressed in IL2 and some male specific  
447 neurons. KLP-6 has been shown to transport TRP channels in male specific neurons (Morsci & Barr,  
448 2011; Peden & Barr, 2005), while its cargo in IL2 neurons has not been reported yet. Interestingly,  
449 *osm-9* encodes a neuronal TRPV channel that regulates chemotaxis, osmotic avoidance, and touch  
450 response. *osm-9* is expressed in ciliated sensory neurons, including the IL2 neurons (Colbert *et al.*,  
451 1997; Wang *et al.*, 2010). *cwp-4* encodes a novel ciliary protein that is expressed in IL2 and some

452 male specific neurons. *cwp-4* encodes an N-terminal signal peptide for secretion and a C-terminal  
453 membrane anchoring domain (Miller & Portman, 2010; Portman & Emmons, 2004). We speculate  
454 that CWP-4 protein is held in place in the ciliary membrane and functions outside the cell (cilium),  
455 where it may be available for protein interaction or as a co-factor for cell (ciliary) surface channel or  
456 receptor proteins. We propose therefore that in IL2 ciliated neurons the DAF-19M functional module  
457 serves to transport, set and keep in place a molecular (protein) machinery for chemo- and/or mechano-  
458 sensation: e.g. receptors, channels, extra- and intra-cellular co-factors and signal transducers; possibly  
459 even at the ciliary tip that is directly exposed to the environment (Fig 6C). Such a setup would ensure  
460 that nictation, an essential behavior for worm survival, can properly be carried out (Lee *et al*, 2017;  
461 Lee *et al.*, 2012). IL2 neurons would thereby be able to sense and transduce the relevant external  
462 stimuli for nictation: (i) sense the surface environment for when and where to initiate nictation; and  
463 (ii) sense and interact with potential animal carriers to initiate the hitchhiking behavior for the worm  
464 to be passively transported over long distances in search for more suitable environmental conditions  
465 (e.g. more or better food) that improve chances for survival. It will in the future be interesting to  
466 determine the exact subcellular or ciliary localizations of the proteins involved in nictation, by using  
467 in transgenic rescue experiments targeted translational GFP fusion proteins that examine relevant  
468 protein domains. Also, measuring neuronal activity of IL2 neurons upon physical stimulation using  
469 calcium imaging will enable to test our hypothesis concerning DAF-19M and its direct target genes.

470 We have uncovered that the DAF-19M functional module also operates in *C. elegans* male specific  
471 ciliated neurons. In male specific neurons, DAF-19M regulates the ciliary kinesin gene *klp-6* (and also  
472 *cwp-4*), and thereby the TRP channels LOV-1 and PKD-2, which are KLP-6 cargoes (Morsci & Barr,  
473 2011; Peden & Barr, 2005; Wang *et al.*, 2010). Both TRP channels localize to cilia in neurons of the  
474 male tail. Both TRP channels and KLP-6 are involved in sensing hermaphrodites during male mating  
475 behavior, which requires crucial chemo- and mechano-sensory steps (Barr & Garcia, 2006; Barr *et al.*,  
476 2018), striking parallels to the above described nictation behavior. We speculate that nictation and  
477 male mating, two distinct yet mechanistically similar behaviors in connection to the sensation and  
478 recognition of the environment (nictation – the surface and a carrier animal; mating – the mating  
479 partner), are regulated by the same program: the DAF-19M functional module. This module is  
480 genetically hard-wired given that both behaviors are essential for worm survival, at the individual  
481 level (nictation) and at the population level (male mating). The DAF-19M module might provide a

482 template for how to organize at the molecular level these essential biological functions. We provide  
483 experimental evidence for the first three direct targets of DAF-19M – *klp-6*, *cwp-4* and *osm-9* – and  
484 present their importance for nictation (for their potential relevance and impact on male mating  
485 behavior see: Miller & Portman, 2010; Peden & Barr, 2005; Zhang *et al*, 2018). We predict the  
486 molecular machineries governing sensory aspects of both behaviors to be complex and depending on  
487 (changing) environmental conditions to be heavily tunable. Thus, we expect a substantially larger set  
488 of direct DAF-19M target genes. To this end, we have generated genome-wide *bona fide* DAF-19M  
489 candidate target gene lists based on the presence of high confidence promoter X-box motif variant  
490 sequence hits and (highly likely) expression in IL2 neurons. Cross-comparing our genome-wide work  
491 with other efforts that have yielded genes functioning in IL2 neurons (Wang *et al*, 2015) will greatly  
492 facilitate (i) extracting new members of the DAF-19M functional module and then (ii) uncovering and  
493 analyzing in detail its mechanistic impact on nictation and male mating.

494

## 495 **Materials and Methods**

496

### 497 Maintenance of *C. elegans* worms and worm strains used

498 All worm strains were maintained at 20°C and handled as previously described (Brenner, 1974),  
499 except for strains carrying *daf-19(of3)*, *daf-19(of4)*, *daf-19(m86)*, or *daf-19(rh1024)* mutant alleles, as  
500 these cause high frequency of dauer larva formation at 20°C (Daf-c phenotype). These *daf-19* mutant  
501 strains were grown at 15°C instead (Swoboda *et al.*, 2000). Some *C. elegans* strains were obtained  
502 from the *Caenorhabditis* Genetics Center (CGC, University of Minnesota, St. Paul, MN, USA;  
503 <https://cgc.umn.edu>) or from the National BioResource Project, Japan  
504 (<https://shigen.nig.ac.jp/c.elegans>). See Table EV7 for a complete list of mutant and transgenic strains  
505 that were used in this study.

506

### 507 Generation of transgene constructs and of transgenic animals

508 PCR-based GFP-fusion constructions were carried out for *klp-6* promoter deletion analysis (Hobert,  
509 2002). Both *klp-6p::gfp* and *klp-6p::mCherry* fusion constructs were created using classical restriction  
510 enzyme-based subcloning methods. Other constructs were created using a Gibson assembly cloning  
511 kit (E5510; New England Biolabs). All DNA fragments were inserted into the GFP vector backbone  
512 pPD95.77, except for *klp-6p::gfp* (inserted into pPD114.108) and *klp-6p::mCherry* (inserted into  
513 pPD117.01; modified to *mCherry* red fluorescence). Plasmid constructs were modified by site-  
514 directed mutagenesis (E0554; New England Biolabs) to create the desired mutations in *klp-6* and *cwp-*  
515 *4*, X-box promoter motif variant sequences (Fig 2C: deletions, substitutions, inversions; 2F:  
516 insertions; 3F: substitutions) and in the *daf-19m* promoter in candidate binding sites for IL2 neuron  
517 terminal selector proteins UNC-86 and CFI-1 (Fig 4E: substitutions). All the cloning and assembly  
518 details of all transgene constructs are available on request.

519 To generate transgenic animals, we microinjected DNA and plasmid constructs into the gonad of  
520 young adult hermaphrodites as previously described (Mello *et al.*, 1991). To isolate transgenic progeny

521 of microinjected hermaphrodites, we used the following co-injection markers for transgenesis: *rol-*  
522 *6(su1006sd)* (roller phenotype), *unc-122p::dsRed* (red fluorescent coelomocytes), *myo-2p::mCherry*  
523 (red fluorescent pharynx), and *act-5p::gfp* (green fluorescent intestine). Plasmid DNAs used for  
524 microinjection were extracted and purified with a QIAGEN plasmid midi kit (Cat. No. 12145) or an  
525 Axygen midi prep kit (Cat. No. AP-MD-P-25) or a Macherey-Nagel NucleoBond Xtra Midi kit (Cat.  
526 No. 740410.100).

527

### 528 Transgene insertion into the genome by gamma-ray irradiation

529 To facilitate our forward genetic screening approach, synchronized L4 larvae of the transgenic strain  
530 *jIEx1900 [klp-6p::gfp; aqp-6p::dsRed; rol-6(su1006sd)]* were gamma-ray irradiated at 4000 rad.  
531 Irradiated worms were moved individually to new plates to determine whether the *jIEx1900* transgene  
532 was successfully integrated into the genome; by measuring the proportion of the roller phenotype in  
533 progeny worms. When the transgenesis marker (roller phenotype) had reached full penetrance (100%)  
534 on a given plate of progeny worms, expression of the relevant plasmid constructs, *klp-6p::gfp* in IL2  
535 neurons and *aqp-6p::dsRed* in IL1 neurons, was confirmed by fluorescence microscopy. Only  
536 integrated lines with fully penetrant expression of both plasmid constructs and the transgenesis marker  
537 were used for follow-up outcrossing and mutagenesis work.

538

### 539 Ethyl methane sulfonate (EMS) mutagenesis and isolation of mutant worms

540 To find regulators of *klp-6* expression in IL2 neurons, the strain LJ800: *jIIs1900 [klp-6p::gfp; aqp-*  
541 *6p::dsRed; rol-6(su1006sd)]* was mutagenized with 50mM EMS and >15,000 worms of the F1  
542 progeny generation were examined for GFP and DsRed expression changes. Mutations were  
543 identified by reduced *klp-6p::gfp* expression in IL2 neurons, both with regard to the number of IL2  
544 neurons expressing GFP and overall GFP fluorescence intensity. Two independent mutant lines were  
545 isolated using the COPAS BIOSORT large particle flow cytometer (Union Biometrica, MA, USA) for

546 high throughput sorting; measuring fluorescence intensity, time-of-flight (for animal length), and  
547 extinction (optical density). Through canonical SNP mapping and whole genome sequencing, we  
548 found that both mutations located in the gene *daf-19*. We named these mutant alleles *of3* and *of4*,  
549 respectively.

550

#### 551 Fluorescence microscopy and sample preparation for imaging

552 Confocal microscopy (ZEISS LSM700; Carl Zeiss) and fluorescence microscopy (Axioplan 2; Carl  
553 Zeiss) were used to observe transgene expression in IL2 neurons and – as needed – in other cell types,  
554 and for the acquisition of fluorescence images. For microscopy and imaging, transgenic animals were  
555 paralyzed with 3mM levamisole and mounted on 3% agar pads. All transgenic animals were observed  
556 and imaged during the first day of adulthood, except when other developmental and life stages were  
557 used for experimentation (Fig EV1A and 1C; strains LJ805 and LJ806).

558

#### 559 Dauer formation assays and fluorescent dye staining to ascertain mutations in the gene *daf-19*

560 Dauer formation assays and DiO (green fluorescent dye) staining were performed as previously  
561 described (Perkins *et al*, 1986; Starich *et al*, 1995). The green fluorescent dye DiO stains a small  
562 number of ciliated sensory neurons in the head and tail of *C. elegans*, all of which are directly  
563 exposed to the environment, including in the head the IL2 neurons (Schroeder *et al*, 2013; Ward *et al*,  
564 1975; White *et al.*, 1986).

565

#### 566 Induction of dauer formation

567 Ten L4 larvae or young adults within the first day of adulthood were moved to synthetic pheromone  
568 plates, including a thin layered lawn of *E. coli* OP50 bacteria, at 25°C for dauer induction (Lee *et al*,  
569 2015; Lee *et al.*, 2017; Lee *et al.*, 2012). Synthetic pheromone plates contain agar (10g/L), agarose

570 (7g/L), NaCl (2g/L), KH<sub>2</sub>PO<sub>4</sub> (3g/L), K<sub>2</sub>HPO<sub>4</sub> (0.5g/L), cholesterol (8mg/L) and the pheromones  
571 ascaroside 1, 2, 3 (2mg/L each) (Butcher *et al*, 2007; Jeong *et al*, 2005; Lee *et al.*, 2017). Synthetic  
572 pheromones were provided by the Young-Ki Paik laboratory at Yonsei University, Seoul, Korea.  
573 After 4 to 5 days, dauer larvae are easily recognizable by their radially constricted bodies and their  
574 dark intestines. The induction of dauer formation was determined in populations consisting of at least  
575 100 worms.

576

### 577 Nictation assays

578 We first created a micro-dirt chip by pouring a 3.5% agar solution onto a PDMS mold (Lee *et al.*,  
579 2015). The solidified chip was then detached from the PDMS mold and dried for 90 min at 37°C. For  
580 nictation assays, more than 30 dauer larvae were collected by a glass capillary tube using M9 isotonic  
581 buffer and mounted onto a freshly prepared micro-dirt chip. After 10-30 min, when dauers started to  
582 move, nictation was quantified as the fraction of nictating worms among moving dauers (Lee *et al.*,  
583 2012). Quiescent dauers were excluded from measurements. Nictation assays were carried out at 25°C  
584 with a humidity of 30%. Assays were repeated at least six times for quantification and statistics.

585

### 586 Analysis of gene expression in IL2 neurons

587 *C. elegans* has a total of six IL2 neurons in the head. We counted the number of IL2 neurons that  
588 express a given gene promoter-to-fluorescent marker fusion (GFP or mCherry) and – when needed –  
589 also determined the intensity of GFP or mCherry expression in IL2 neurons. For additional  
590 distinction, GFP or mCherry expression intensity was divided into three categories: strong, weak, and  
591 off (absent). At least 20 worms per transgenic line were examined except for one *klp-6p::gfp*  
592 *substitution* (-614, -608) line (Fig 2E) and the transgenic lines for examining *unc-17p::gfp* expression  
593 (Fig 4D). Typically, we examined GFP or mCherry expression in transgenic animals of at least two  
594 independent transgenic lines with same genetic background. For some experiments, we used *klp-*



595 *6p::mCherry* as marker for IL2 neurons to confirm the correct expression in IL2 neurons of *daf-19m*  
596 and other IL2-expressed genes fused to GFP.

597

#### 598 Yeast-one-hybrid (Y1H) screening assays

599 The regulatory element of the *k1p-6* promoter that we have identified (-628, -590; gtcctgttcc ttcgtcgtc  
600 tggagaccta catggcaac) was cloned as target sequence or bait into the pADE2i vector, constructed by  
601 Panbionet (Pohang, Korea), for Y1H screening in order to identify candidate proteins that bind to this  
602 element. This vector, designed for the Matchmaker Gold Yeast One Hybrid library (Clontech, CA,  
603 USA), contains the yeast iso-1-cytochrome C minimal promoter and the ADE2 gene. As prey *C.*  
604 *elegans* cDNAs were inserted into the pPC86 vector, containing the GAL4 activation domain (AD).  
605 We used these GAL4 AD fusion libraries to screen for cDNAs encoding proteins that interact with the  
606 target or bait sequence. Positive interactions (positive yeast clones) showed ADE2 expression. We  
607 used PCR and sequencing to examine positive clones (Table EV1).

608

#### 609 Statistical analyses

610 For all experimental quantifications, the statistical significance was determined with one-way  
611 ANOVA and Tukey's multiple comparison post-test, except for when a given class of results was zero  
612 and therefore statistics could not be applied (Fig 3G).

613

#### 614 Bioinformatics: genome-wide sequence motif searches

615 The X-box DNA sequence motif is an imperfect, inverted repeat, consisting of two 6-nucleotide half-  
616 sites (5' and 3') separated by 1-3 spacer nucleotide(s). Its canonical sequence composition is bound  
617 by RFX transcription factors (TFs) and has been determined both *in vitro* and *in vivo* (Emery *et al.*,  
618 1996b; Gajiwala *et al.*, 2000; Jolma *et al.*, 2013; Swoboda *et al.*, 2000). The sole *C. elegans* RFX TF

619 gene, *daf-19*, encodes different isoforms that all share the same DNA binding domain (DBD) (Fig 1B)  
620 (De Stasio *et al.*, 2018; Senti & Swoboda, 2008; Swoboda *et al.*, 2000; Wang *et al.*, 2010). Through  
621 work on DAF-19 ciliary target genes, the sequence composition of the canonical X-box motif is very  
622 well known in worms (Table EV2 and EV3) (Blacque *et al.*, 2005; Burghoorn *et al.*, 2012; Chen *et*  
623 *al.*, 2006; Efimenko *et al.*, 2005).

624 The RFX TF isoform DAF-19M heads a regulatory subroutine in IL2 neurons (Fig 6), which employs  
625 an X-box motif variant that is slightly different from a canonical X-box motif (Fig 2 and Fig 3; Fig  
626 EV2; Table EV2 and EV3). To search for potentially additional members of this DAF-19M  
627 subroutine throughout the *C. elegans* genome, we used the founding member of this subroutine, the  
628 *klp-6* X-box motif variant and very similar sequences as a search tool.

629 First, we used the MEME software suite (version 5.2.0; <http://meme-suite.org/tools/meme>) to build  
630 position weight matrices (PWMs) of both X-box variants and of canonical X-boxes as reference. The  
631 *C. elegans* canonical X-box motif, with very rare exceptions (e.g. *nph-1*; Burghoorn *et al.*, 2012),  
632 consists of two 6-nucleotides half sites (5' and 3') separated by a double nucleotide (AT) spacer,  
633 whereby positional nucleotide conservation reflects experimentally determined binding characteristics  
634 between the RFX TF (DAF-19) DBD and the X-box DNA sequence motif (Emery *et al.*, 1996b;  
635 Gajiwala *et al.*, 2000; Jolma *et al.*, 2013; Swoboda *et al.*, 2000). For example: (i) positions 1 and 3 of  
636 the 5' X-box half site are most often G and T, and only in a minority of cases A and C, respectively;  
637 (ii) the double nucleotide spacer sequence is almost exclusively AT; (iii) positions 4 and 6 of the 3'  
638 X-box half site are most often A and C, and only in a minority of cases G and T, respectively.

639 We built a PWM of the canonical X-box motif based on 40 X-box sequences derived from a number  
640 of *C. elegans* genes with experimentally proven X-boxes and from their direct orthologs in closely  
641 related *Caenorhabditis* species (Table EV2) (Blacque *et al.*, 2005; Burghoorn *et al.*, 2012; Chen *et al.*,  
642 2006; Efimenko *et al.*, 2005). Of these 40 X-box sequences, 18 fit an “ideal” sequence conservation  
643 pattern (5' half site position 1 = G and position 3 = T; double nucleotide spacer = AT; 3' half site  
644 position 4 = A and position 6 = C), 21 have one deviation from an “ideal” sequence conservation  
645 pattern, while 1 has two deviations. We then built a PWM of X-box motif variants based on 37 X-box  
646 sequences derived from a mixture of *C. elegans* genes with experimentally proven X-boxes and of  
647 candidate X-box sequence hits, and from their direct orthologs in closely related *Caenorhabditis*

648 species, respectively (Table EV3) (Blacque *et al.*, 2005; Burghoorn *et al.*, 2012; Chen *et al.*, 2006;  
649 Efimenko *et al.*, 2005; including this work). Of these 37 X-box sequences, 10 contain only a single  
650 nucleotide spacer like is the case for the *klp-6* X-box promoter motif variant. Of the remaining 27 X-  
651 box sequences with a double nucleotide spacer, only 4 fit an “ideal” sequence conservation pattern (5’  
652 half site position 1 = G and position 3 = T; double nucleotide spacer = AT; 3’ half site position 4 = A  
653 and position 6 = C), while 17 have one deviation from an “ideal” sequence conservation pattern, and 6  
654 have two deviations. It is apparent that both PWMs (canonical versus variant) share large overlaps yet  
655 also present slight differences (see also the sequence logos in Table EV2 and EV3), acknowledging  
656 that the different isoforms of the sole *C. elegans* RFX TF, DAF-19, share the exact same DBD.

657 Secondly, we used both PWMs to carry out genome-wide searches through the *C. elegans* genome.  
658 All candidate X-box sequence motif hits were extracted using the FIMO tool (Find Individual Motif  
659 Occurrences; version 5.3.0; <http://meme-suite.org/tools/fimo>), whereby the FIMO search parameter p-  
660 value was required to be smaller than 1E-04 (standard cut-off setting). We allowed the 1-3 spacer  
661 nucleotide(s) to be N, NN or NNN. This to reflect the fact that the *klp-6* X-box motif variant contains  
662 only a single nucleotide spacer (T) and that in a variety of species the majority of X-box motifs  
663 contain a double nucleotide spacer, while single and triple nucleotide spacer sequences have also been  
664 found (Burghoorn *et al.*, 2012; Emery *et al.*, 1996b; Laurençon *et al.*, 2007; Piasecki *et al.*, 2010;  
665 Sugiaman-Trapman *et al.*, 2018).

666 As expected in all our genome-wide searches (given the lengths and complexities of query sequence  
667 PWMs; canonical versus variant; allowing for 1-3 spacer nucleotides), we found large numbers of X-  
668 box candidate hits (>75,000), whereby in searches using NN double nucleotide spacers the search  
669 output contained well-represented hits of already known and experimentally proven X-box motifs of  
670 ciliary genes (Table EV5).

671 Thirdly, to focus on candidate X-box hits as part of a DAF-19M regulatory subroutine in IL2 neurons,  
672 we employed the following sorting and filtering steps: (i) To enrich for potential promoter motifs, all  
673 candidate X-box sequence hits were required to locate within 1 kb upstream or downstream of  
674 position +1 of the start codon ATG of a given gene. (ii) We compared side-by-side the output of the  
675 search efforts employing canonical versus variant X-box query sequence PWMs. (iii) We compared  
676 the output lists of candidate X-box motifs and corresponding genes with *C. elegans* gene lists

677 extracted from Wormbase (WS235; [www.wormbase.org](http://www.wormbase.org)) where the required gene expression pattern  
678 is “ciliated neuron or labial neuron or inner labial neuron or IL2 neuron” (see also Wang *et al.*, 2015).  
679 The resulting lists of high-confidence candidate X-box motifs and corresponding genes are presented  
680 in Tables EV4-EV6, all of which contain large numbers of novel candidate members of the DAF-19M  
681 regulatory subroutine in IL2 neurons.

682

## 683 **Acknowledgements**

684

685 We thank Jiseon Lim and Eunkyeong Kim for helping with the bioinformatics-based sequence motif  
686 searches for the X-box motif variant. Worm expression vectors were kindly provided by Andrew Fire.  
687 Mutant worm strains were kindly provided by the *Caenorhabditis* Genetics Center (USA) and the  
688 National BioResource Project (Japan), Elizabeth De Stasio, H. Robert Horvitz, Darrell J. Killian, and  
689 Douglas S. Portman.

690

691 P. Swoboda acknowledges grant support from the following sources: Swedish Research Council  
692 Project grant, Swedish Research Council Equipment grant (Union Biometrica Worm Sorter), Swedish  
693 Research Council Sweden-Korea Exchange Program, STINT Organization Sweden-Korea  
694 Collaboration Program, Torsten Söderberg Foundation, Åhlén Foundation, OE & Edla Johansson  
695 Foundation, Karolinska Institute Strategic Neurosciences Program.

696

697 Research in the J. Lee laboratory was supported by the Korea-Sweden Research Cooperation through  
698 the National Research Foundation of Korea (NRF) (NRF-2016K1A3A1A47921615), the STINT  
699 Organization Korea-Sweden Collaboration Program, and the Basic Science Research Program  
700 through the National Research Foundation of Korea (NRF) (NRF-2019R1A6A1A10073437).

701

## 702 **Author contributions**

703

704 Project conceptualization and planning: S. Ahn, P. Swoboda, J. Lee

705 Experimentation and methodology: S. Ahn, H. Yang, S. Son, D. Park, J. Lee

706 Data analysis: S. Ahn, H. Yang, S. Son, D. Park, P. Swoboda, J. Lee

707 Critical resources and reagents: S. Ahn, H. Yang, D. Park, J. Lee

708 Writing and illustrations – draft: S. Ahn, H. Yim, P. Swoboda, J. Lee

709 Writing and illustrations – editing and review: S. Ahn, H. Yim, P. Swoboda, J. Lee

710 Supervision and project management: P. Swoboda, J. Lee

711 Funding acquisition: P. Swoboda, J. Lee

712

713 **Conflict of interest**

714

715 The authors declare no conflict of interest.

716

## 717 References

718

- 719 1. Altun-Gultekin Z, Andachi Y, Tsalik EL, Pilgrim D, Kohara Y, Hobert O (2001) A  
720 regulatory cascade of three homeobox genes, *ceh-10*, *ttx-3* and *ceh-23*, controls cell fate  
721 specification of a defined interneuron class in *C. elegans*. *Development (Cambridge,*  
722 *England)* 128: 1951-1969
- 723 2. Anvarian Z, Mykytyn K, Mukhopadhyay S, Pedersen LB, Christensen ST (2019) Cellular  
724 signalling by primary cilia in development, organ function and disease. *Nat Rev Nephrol* 15:  
725 199-219
- 726 3. Barr MM, Garcia LR (2006) Male mating behavior. *WormBook : the online review of C*  
727 *elegans biology*: 1-11
- 728 4. Barr MM, Garcia LR, Portman DS (2018) Sexual Dimorphism and Sex Differences in  
729 *Caenorhabditis elegans* Neuronal Development and Behavior. *Genetics* 208: 909-935
- 730 5. Bhuckory S, Kays JC, Dennis AM (2019) In Vivo Biosensing Using Resonance Energy  
731 Transfer. *Biosensors (Basel)* 9
- 732 6. Blacque OE, Perens EA, Boroevich KA, Inglis PN, Li C, Warner A, Khattra J, Holt RA, Ou  
733 G, Mah AK *et al* (2005) Functional genomics of the cilium, a sensory organelle. *Current*  
734 *biology : CB* 15: 935-941
- 735 7. Brenner S (1974) The genetics of *Caenorhabditis elegans*. *Genetics* 77: 71-94
- 736 8. Burghoorn J, Piasecki BP, Crona F, Phirke P, Jeppsson KE, Swoboda P (2012) The in vivo  
737 dissection of direct RFX-target gene promoters in *C. elegans* reveals a novel cis-regulatory  
738 element, the C-box. *Developmental biology* 368: 415-426
- 739 9. Butcher RA, Fujita M, Schroeder FC, Clardy J (2007) Small-molecule pheromones that  
740 control dauer development in *Caenorhabditis elegans*. *Nature chemical biology* 3: 420-422
- 741 10. Cassada RC, Russell RL (1975) The dauerlarva, a post-embryonic developmental variant of  
742 the nematode *Caenorhabditis elegans*. *Developmental biology* 46: 326-342
- 743 11. Chen N, Mah A, Blacque OE, Chu J, Phgora K, Bakhoun MW, Newbury CR, Khattra J,  
744 Chan S, Go A *et al* (2006) Identification of ciliary and ciliopathy genes in *Caenorhabditis*  
745 *elegans* through comparative genomics. *Genome biology* 7: R126
- 746 12. Choksi SP, Lauter G, Swoboda P, Roy S (2014) Switching on cilia: transcriptional networks  
747 regulating ciliogenesis. *Development (Cambridge, England)* 141: 1427-1441
- 748 13. Colbert HA, Smith TL, Bargmann CI (1997) OSM-9, a novel protein with structural  
749 similarity to channels, is required for olfaction, mechanosensation, and olfactory adaptation  
750 in *Caenorhabditis elegans*. *The Journal of neuroscience : the official journal of the Society*  
751 *for Neuroscience* 17: 8259-8269
- 752 14. De Stasio EA, Mueller KP, Bauer RJ, Hurlburt AJ, Bice SA, Scholtz SL, Phirke P,  
753 Sugiaman-Trapman D, Stinson LA, Olson HB *et al* (2018) An Expanded Role for the RFX  
754 Transcription Factor DAF-19, with Dual Functions in Ciliated and Non-ciliated Neurons.  
755 *Genetics*
- 756 15. Efimenko E, Bubb K, Mak HY, Holzman T, Leroux MR, Ruvkun G, Thomas JH, Swoboda  
757 P (2005) Analysis of *xbx* genes in *C. elegans*. *Development (Cambridge, England)* 132:  
758 1923-1934
- 759 16. Emery P, Durand B, Mach B, Reith W (1996a) RFX proteins, a novel family of DNA  
760 binding proteins conserved in the eukaryotic kingdom. *Nucleic acids research* 24: 803-807
- 761 17. Emery P, Strubin M, Hofmann K, Bucher P, Mach B, Reith W (1996b) A consensus motif in  
762 the RFX DNA binding domain and binding domain mutants with altered specificity.  
763 *Molecular and cellular biology* 16: 4486-4494
- 764 18. Etchberger JF, Flowers EB, Poole RJ, Bashllari E, Hobert O (2009) Cis-regulatory  
765 mechanisms of left/right asymmetric neuron-subtype specification in *C. elegans*.  
766 *Development (Cambridge, England)* 136: 147-160



- 767 19. Etchberger JF, Lorch A, Sleumer MC, Zapf R, Jones SJ, Marra MA, Holt RA, Moerman DG,  
768 Hobert O (2007) The molecular signature and cis-regulatory architecture of a *C. elegans*  
769 gustatory neuron. *Genes & development* 21: 1653-1674
- 770 20. Gajiwala KS, Chen H, Cornille F, Roques BP, Reith W, Mach B, Burley SK (2000)  
771 Structure of the winged-helix protein hRFX1 reveals a new mode of DNA binding. *Nature*  
772 403: 916-921
- 773 21. Gordon PM, Hobert O (2015) A competition mechanism for a homeotic neuron identity  
774 transformation in *C. elegans*. *Developmental cell* 34: 206-219
- 775 22. Hobert O (2002) PCR fusion-based approach to create reporter gene constructs for  
776 expression analysis in transgenic *C. elegans*. *Biotechniques* 32: 728-730
- 777 23. Hobert O (2008) Regulatory logic of neuronal diversity: terminal selector genes and selector  
778 motifs. *Proceedings of the National Academy of Sciences of the United States of America*  
779 105: 20067-20071
- 780 24. Hobert O (2011) Regulation of terminal differentiation programs in the nervous system.  
781 *Annual review of cell and developmental biology* 27: 681-696
- 782 25. Hobert O (2016) Terminal Selectors of Neuronal Identity. *Current topics in developmental*  
783 *biology* 116: 455-475
- 784 26. Hurd DD, Miller RM, Nunez L, Portman DS (2010) Specific alpha- and beta-tubulin  
785 isotypes optimize the functions of sensory Cilia in *Caenorhabditis elegans*. *Genetics* 185:  
786 883-896
- 787 27. Inglis PN, Ou G, Leroux MR, Scholey JM (2007) The sensory cilia of *Caenorhabditis*  
788 *elegans*. *WormBook : the online review of C elegans biology*: 1-22
- 789 28. Jeong PY, Jung M, Yim YH, Kim H, Park M, Hong E, Lee W, Kim YH, Kim K, Paik YK  
790 (2005) Chemical structure and biological activity of the *Caenorhabditis elegans* dauer-  
791 inducing pheromone. *Nature* 433: 541-545
- 792 29. Jolma A, Yan J, Whittington T, Toivonen J, Nitta KR, Rastas P, Morgunova E, Enge M,  
793 Taipale M, Wei G *et al* (2013) DNA-binding specificities of human transcription factors.  
794 *Cell* 152: 327-339
- 795 30. Lai HT, Chiang CM (2013) Bimolecular Fluorescence Complementation (BiFC) Assay for  
796 Direct Visualization of Protein-Protein Interaction in vivo. *Bio Protoc* 3
- 797 31. Laurençon A, Dubruille R, Efimenko E, Grenier G, Bissett R, Cortier E, Rolland V,  
798 Swoboda P, Durand B (2007) Identification of novel regulatory factor X (RFX) target genes  
799 by comparative genomics in *Drosophila* species. *Genome biology* 8: R195
- 800 32. Lee D, Lee H, Choi M-k, Park S, Lee J (2015) Nictation Assays for *Caenorhabditis* and  
801 Other Nematodes. *Bio-protocol* 5: e1433
- 802 33. Lee D, Yang H, Kim J, Brady S, Zdraljevic S, Zamanian M, Kim H, Paik YK, Kruglyak L,  
803 Andersen EC *et al* (2017) The genetic basis of natural variation in a phoretic behavior.  
804 *Nature communications* 8: 273
- 805 34. Lee H, Choi MK, Lee D, Kim HS, Hwang H, Kim H, Park S, Paik YK, Lee J (2012)  
806 Nictation, a dispersal behavior of the nematode *Caenorhabditis elegans*, is regulated by IL2  
807 neurons. *Nat Neurosci* 15: 107-112
- 808 35. Lemeille S, Paschaki M, Baas D, Morlé L, Duteyrat JL, Ait-Lounis A, Barras E, Soulavie F,  
809 Jerber J, Thomas J *et al* (2020) Interplay of RFX transcription factors 1, 2 and 3 in motile  
810 ciliogenesis. *Nucleic acids research*
- 811 36. Maguire JE, Silva M, Nguyen KC, Hellen E, Kern AD, Hall DH, Barr MM (2015)  
812 Myristoylated CIL-7 regulates ciliary extracellular vesicle biogenesis. *Molecular biology of*  
813 *the cell* 26: 2823-2832
- 814 37. Mello CC, Kramer JM, Stinchcomb D, Ambros V (1991) Efficient gene transfer in  
815 *C. elegans*: extrachromosomal maintenance and integration of transforming sequences. *The*  
816 *EMBO journal* 10: 3959-3970
- 817 38. Miller RM, Portman DS (2010) A latent capacity of the *C. elegans* polycystins to disrupt  
818 sensory transduction is repressed by the single-pass ciliary membrane protein CWP-5.  
819 *Disease models & mechanisms* 3: 441-450
- 820 39. Mitchison HM, Valente EM (2017) Motile and non-motile cilia in human pathology: from  
821 function to phenotypes. *J Pathol* 241: 294-309

- 822 40. Morsci NS, Barr MM (2011) Kinesin-3 KLP-6 regulates intraflagellar transport in male-  
823 specific cilia of *Caenorhabditis elegans*. *Current biology : CB* 21: 1239-1244
- 824 41. Mukhopadhyay S, Lu Y, Qin H, Lanjuin A, Shaham S, Sengupta P (2007) Distinct IFT  
825 mechanisms contribute to the generation of ciliary structural diversity in *C. elegans*. *The*  
826 *EMBO journal* 26: 2966-2980
- 827 42. Nachury MV, Mick DU (2019) Establishing and regulating the composition of cilia for  
828 signal transduction. *Nature reviews Molecular cell biology* 20: 389-405
- 829 43. Ouellet J, Li S, Roy R (2008) Notch signalling is required for both dauer maintenance and  
830 recovery in *C. elegans*. *Development (Cambridge, England)* 135: 2583-2592
- 831 44. Peden EM, Barr MM (2005) The KLP-6 kinesin is required for male mating behaviors and  
832 polycystin localization in *Caenorhabditis elegans*. *Current biology : CB* 15: 394-404
- 833 45. Perkins LA, Hedgecock EM, Thomson JN, Culotti JG (1986) Mutant sensory cilia in the  
834 nematode *Caenorhabditis elegans*. *Developmental biology* 117: 456-487
- 835 46. Phirke P, Efimenko E, Mohan S, Burghoorn J, Crona F, Bakhoun MW, Trieb M, Schuske  
836 K, Jorgensen EM, Piasecki BP *et al* (2011) Transcriptional profiling of *C. elegans* DAF-19  
837 uncovers a ciliary base-associated protein and a CDK/CCRK/LF2p-related kinase required  
838 for intraflagellar transport. *Developmental biology* 357: 235-247
- 839 47. Piasecki BP, Burghoorn J, Swoboda P (2010) Regulatory Factor X (RFX)-mediated  
840 transcriptional rewiring of ciliary genes in animals. *Proceedings of the National Academy of*  
841 *Sciences of the United States of America* 107: 12969-12974
- 842 48. Portman DS, Emmons SW (2004) Identification of *C. elegans* sensory ray genes using  
843 whole-genome expression profiling. *Developmental biology* 270: 499-512
- 844 49. Rand JB (1989) Genetic analysis of the *cha-1-unc-17* gene complex in *Caenorhabditis*.  
845 *Genetics* 122: 73-80
- 846 50. Reed EM, Wallace HR (1965) Leaping Locomotion by an Insect-parasitic Nematode. *Nature*  
847 206: 210-211
- 848 51. Reiter JF, Leroux MR (2017) Genes and molecular pathways underpinning ciliopathies.  
849 *Nature reviews Molecular cell biology* 18: 533-547
- 850 52. Schroeder NE, Androwski RJ, Rashid A, Lee H, Lee J, Barr MM (2013) Dauer-specific  
851 dendrite arborization in *C. elegans* is regulated by KPC-1/Furin. *Current biology : CB* 23:  
852 1527-1535
- 853 53. Senti G, Swoboda P (2008) Distinct isoforms of the RFX transcription factor DAF-19  
854 regulate ciliogenesis and maintenance of synaptic activity. *Molecular biology of the cell* 19:  
855 5517-5528
- 856 54. Shaham S (2010) Chemosensory organs as models of neuronal synapses. *Nat Rev Neurosci*  
857 11: 212-217
- 858 55. Starich TA, Herman RK, Kari CK, Yeh WH, Schackwitz WS, Schuyler MW, Collet J,  
859 Thomas JH, Riddle DL (1995) Mutations affecting the chemosensory neurons of  
860 *Caenorhabditis elegans*. *Genetics* 139: 171-188
- 861 56. Sugiaman-Trapman D, Vitezic M, Jouhilahti EM, Mathelier A, Lauter G, Misra S, Daub CO,  
862 Kere J, Swoboda P (2018) Characterization of the human RFX transcription factor family by  
863 regulatory and target gene analysis. *BMC genomics* 19: 181
- 864 57. Sulston JE, Schierenberg E, White JG, Thomson JN (1983) The embryonic cell lineage of  
865 the nematode *Caenorhabditis elegans*. *Developmental biology* 100: 64-119
- 866 58. Swoboda P, Adler HT, Thomas JH (2000) The RFX-type transcription factor DAF-19  
867 regulates sensory neuron cilium formation in *C. elegans*. *Mol Cell* 5: 411-421
- 868 59. Wang J, Kaletsky R, Silva M, Williams A, Haas LA, Androwski RJ, Landis JN, Patrick C,  
869 Rashid A, Santiago-Martinez D *et al* (2015) Cell-Specific Transcriptional Profiling of  
870 Ciliated Sensory Neurons Reveals Regulators of Behavior and Extracellular Vesicle  
871 Biogenesis. *Current biology : CB* 25: 3232-3238
- 872 60. Wang J, Schwartz HT, Barr MM (2010) Functional specialization of sensory cilia by an RFX  
873 transcription factor isoform. *Genetics* 186: 1295-1307
- 874 61. Ward S, Thomson N, White JG, Brenner S (1975) Electron microscopical reconstruction of  
875 the anterior sensory anatomy of the nematode *Caenorhabditis elegans*. *J Comp Neurol* 160:  
876 313-337

- 877 62. Wells KL, Rowneki M, Killian DJ (2015) A splice acceptor mutation in *C. elegans* daf-  
878 19/Rfx disrupts functional specialization of male-specific ciliated neurons but does not affect  
879 ciliogenesis. *Gene* 559: 196-202
- 880 63. White JG, Southgate E, Thomson JN, Brenner S (1986) The structure of the nervous system  
881 of the nematode *Caenorhabditis elegans*. *Philos Trans R Soc Lond B Biol Sci* 314: 1-340
- 882 64. Xie Y, Moussaif M, Choi S, Xu L, Sze JY (2013) RFX transcription factor DAF-19 regulates  
883 5-HT and innate immune responses to pathogenic bacteria in *Caenorhabditis elegans*. *PLoS*  
884 *genetics* 9: e1003324
- 885 65. Zhang F, Bhattacharya A, Nelson JC, Abe N, Gordon P, Lloret-Fernandez C, Maicas M,  
886 Flames N, Mann RS, Colon-Ramos DA *et al* (2014) The LIM and POU homeobox genes *ttx-*  
887 *3* and *unc-86* act as terminal selectors in distinct cholinergic and serotonergic neuron types.  
888 *Development (Cambridge, England)* 141: 422-435
- 889 66. Zhang H, Yue X, Cheng H, Zhang X, Cai Y, Zou W, Huang G, Cheng L, Ye F, Kang L  
890 (2018) OSM-9 and an amiloride-sensitive channel, but not PKD-2, are involved in  
891 mechanosensation in *C. elegans* male ray neurons. *Scientific reports* 8: 7192  
892

893 **Figure legends**

894

895 **Figure 1- Novel mutations of the DAF-19/RFX transcription factor impact the expression of the**  
896 **IL2 neuron identity gene *klp-6*.**

897 **A** EMS mutagenesis scheme of *jlls1900*, an integrated transgene carrying *klp-6p::gfp* and *aqp-*  
898 *6p::dsRed* as IL2 and IL1 neuronal markers, respectively. Mutants with decreased *klp-6* specific  
899 expression were isolated using the COPAS Biosort Flow Cytometer.

900 **B** The *daf-19* specific mutant alleles *of3* and *of4* are located in the dimerization domain (DIM) and the  
901 DNA binding domain (DBD), respectively. The *of3* mutation affects amino acid 537 (Glutamine to  
902 Stop). The *of4* mutation affects amino acid 302 (Glycine to Glutamate). Other *daf-19* specific  
903 mutations relevant for this work are also indicated in the schematic.

904 **C** Confocal images of *jlls1900*, *daf-19(of3); jlls1900*, and *daf-19(of4); jlls1900*. In every image, the  
905 dotted line outlines the shape of the worm. IL2 neurons are indicated in the *jlls1900* image (arrows).  
906 Solid-line ellipses indicate absent *klp-6p::gfp* fluorescent signals in IL2 neurons in both *daf-19(of3);*  
907 *jlls1900* and *daf-19(of4); jlls1900*. Scale bars are 20  $\mu\text{m}$ .

908 **D** Confocal images of *daf-19(of3); jlls1900* with or without the presence of a transgene carrying  
909 functional *daf-19* (*Ex[daf-19fosmid]*). In every image, the dotted line outlines the shape of the worm.  
910 IL2 neurons are indicated in the *daf-19(of3); jlls1900; Ex[daf-19 fosmid]* image (arrows). The solid-  
911 line ellipse indicates absent *klp-6p::gfp* fluorescent signals in IL2 neurons in *daf-19(of3); jlls1900*.  
912 Non-specific signals are indicated in *daf-19(of3); jlls1900; Ex[daf-19 fosmid]* (Stars). Scale bars are  
913 20  $\mu\text{m}$ .

914 **E** Confocal images of *jlls1900* and *daf-19(of3); jlls1900*, and *daf-19(of3); jlls1900; Ex[daf-19*  
915 *fosmid]* stained with the green-fluorescent dye DiO. In every image, the dotted line outlines the shape  
916 of the worm. Ciliated neurons that stain with DiO (IL2, ADL, ASH, ASJ, ASK) are indicated  
917 (arrows). Non-specific signals are indicated in *daf-19(of3); jlls1900; Ex[daf-19 fosmid]* (Stars). Scale  
918 bars are 20  $\mu\text{m}$ .

919

920 **Figure 2- Identification of a *cis*-regulatory promoter element, an X-box motif variant, that**  
921 **controls *klp-6* expression in IL2 neurons.**

922 **A** *klp-6* promoter deletion analyses and confocal images of *Ex[klp-6p::gfp]* transgenic animals  
923 carrying the indicated *klp-6* promoter truncation construct. *klp-6* promoter deletion analyses identified  
924 the relevant promoter region that controls *klp-6* expression in IL2 neurons. Truncated *klp-6* promoters  
925 were fused to the GFP gene using the fusion PCR method. In every image, the dotted line outlines the  
926 shape of the worm. IL2 neurons are indicated (arrows). Scale bars are 20  $\mu$ m.

927 **B** Illustration of mutagenesis of the *klp-6* promoter and confocal images of *Ex[klp-6p::gfp]* transgenic  
928 animals carrying the indicated *klp-6* promoter construct mutation. Mutagenesis of the *klp-6* promoter  
929 determined the necessity of the relevant promoter region, an X-box motif variant, for *klp-6* expression  
930 in IL2 neurons: deletion ( $\Delta$  -614, -608: from -614 to -608 upstream of the *klp-6* start codon ATG);  
931 substitution (sequences from -614 to -608 were substituted with AAAAAAA); and three different  
932 inversions (sequences from -614 to -608 or from -607 to -600 or from -614 to -600 were substituted  
933 with the corresponding sequences from the complementary strand). These *klp-6* promoter mutations  
934 were carried out using a commercial plasmid mutagenesis kit in a *klp-6p::gfp* plasmid background,  
935 itself based on the vector pPD114.108. In every image, the dotted line outlines the shape of the worm.  
936 IL2 neurons are indicated (arrows). Scale bars are 20  $\mu$ m.

937 **C** Quantification of GFP expression in transgenic animals carrying *Ex[klp-6p::gfp]* with the indicated  
938 *klp-6* promoter construct mutation. 20 worms per independent transgenic line were examined except  
939 for the *substitution* (-614, -608) line, where 15 worms were examined. We distinguished between  
940 strong, weak and absent (off) GFP expression and determined in how many of the six IL2 neurons  
941 GFP expression was detected. Statistical significance was determined with one-way ANOVA and  
942 Tukey's multiple comparison post-test. \*\*\*  $P \leq 0.001$ , significantly different from the control. NS, not  
943 significant. Overall  $p$  value for ANOVA is less than 0.001 ( $P < 0.001$ ).

944 **D** Illustration of tandem repeats of *klp-6* X-box motif variant minimal promoter regions and confocal  
945 images of transgenic animals carrying the indicated tandem repeat of the *klp-6* X-box motif variant  
946 minimal promoter regions fused to GFP: 5' half site motif, full motif, extended motif. Tandem repeats  
947 of three different *klp-6* X-box motif variants fused to GFP; magenta – 5' half of the X-box motif  
948 variant (-614, -608); grey – full X-box motif variant (-614, -602); light green – extended X-box motif



949 variant (-628, -590) including adjacent promoter sequences that contain one additional 5' and 3' X-  
950 box like half site, respectively (see also Fig EV2A). The different tandem repeats were created *de*  
951 *novo* in an empty GFP vector (pPD95.77) background using a commercial plasmid mutagenesis kit. In  
952 every image, the dotted line outlines the shape of the worm. IL2 neurons are indicated (arrows). Scale  
953 bars are 20  $\mu$ m.

954 **E** Quantification of GFP expression in transgenic animals carrying the indicated tandem repeat of the  
955 *klp-6* X-box motif variant minimal promoter regions fused to GFP: 5' half site motif, full motif,  
956 extended motif. 20 worms per independent transgenic line were examined. We determined in how  
957 many of the six IL2 neurons GFP expression was detected. Statistical significance was determined  
958 with one-way ANOVA and Tukey's multiple comparison post-test. \*  $P \leq 0.05$ , \*\*\*  $P \leq 0.001$ ,  
959 significantly different from the control. NS, not significant. Overall  $p$  value for ANOVA is less than  
960 0.001 ( $P < 0.001$ ).

961

962 **Figure 3- The gene isoform *daf-19m*, originally discovered for male mating, regulates genes**  
963 **expressed in IL2 neurons through an X-box promoter motif variant.**

964 **A** Confocal images of *daf-19* isoform specific rescue in a *daf-19* null mutant background [JT6924:  
965 *daf-19(m86); daf-12(sa204)*]. We revealed genetic rescue by using the tandem repeat construct with  
966 the *klp-6* extended X-box motif variant minimal promoter region fused to GFP. Constructs for *daf-19*  
967 isoform specific rescue are as follows: *pGG14* and *pJL1920* for *daf-19c*; *pJL1921* for *daf-19m*;  
968 *pGG14* and *pJL1921* for *daf-19c* and *daf-19m* (see also Fig EV4A). In every image, the dotted line  
969 outlines the shape of the worm. IL2 neurons are indicated (arrows), whereby *klp-6p::mCherry* was  
970 used as an IL2 neuron specific marker. In one image, the solid-line ellipse indicates *klp-6p::mCherry*  
971 red-fluorescent signals in unidentified, but not IL2, neurons. Scale bars are 20  $\mu$ m.

972 **B** Quantification of GFP expression in transgenic animals carrying the indicated *daf-19* isoform  
973 specific rescue construct. 20 worms per independent transgenic line were examined. We determined  
974 in how many of the six IL2 neurons GFP expression was detected. Statistical significance was  
975 determined with one-way ANOVA and Tukey's multiple comparison post-test. \*\*\*  $P \leq 0.001$ ,  
976 significantly different from the control. Overall  $p$  value for ANOVA is less than 0.001 ( $P < 0.001$ ).

977 **C** Confocal images of transgenic animals carrying promoter-to-GFP fusions of four genes  
978 prominently expressed and functioning in IL2 neurons: *osm-9*, *cwp-4*, *cil-7*, *tba-6*. We determined  
979 gene expression in a *daf-19* null mutant background [JT6924: *daf-19(m86)*; *daf-12(sa204)*], without (-  
980 ) or with (+) the addition of a *daf-19m* specific rescue construct. In every image, the dotted line  
981 outlines the shape of the worm. IL2 neurons are indicated (arrows), whereby *klp-6p::mCherry* was  
982 used as an IL2 neuron specific marker. Solid-line ellipses indicate absent *klp-6p* specific fluorescent  
983 signals in IL2 neurons. Scale bars are 20  $\mu$ m.

984 **D** Quantification of GFP expression in transgenic animals carrying promoter-to-GFP fusions for four  
985 IL2 neuron genes (*osm-9*, *cwp-4*, *cil-7*, *tba-6*) without (-) or with (+) the addition of a *daf-19m*  
986 specific rescue construct. 20 worms per independent transgenic line were examined. We determined  
987 in how many of the six IL2 neurons GFP expression was detected. Statistical significance was  
988 determined with one-way ANOVA and Tukey's multiple comparison post-test. \*\*\*  $P \leq 0.001$ ,  
989 significantly different from the control. NS, not significant. Overall  $p$  value for ANOVA is less than  
990 0.001 ( $P < 0.001$ ).

991 **E** Confocal images of *Ex[cwp-4p::gfp]* transgenic animals carrying either the wild-type *cwp-4*  
992 promoter or the indicated *cwp-4* promoter mutation construct. The *cwp-4* promoter mutation consisted  
993 of substituting both X-box variant sequences (-90 to -78 and -68 to -56) with GGATCC C GGATCC.  
994 These substitutions were carried out using a commercial plasmid mutagenesis kit in a fusion PCR  
995 generated *cwp-4p::gfp* background. In every image, the dotted line outlines the shape of the worm.  
996 IL2 neurons are indicated (arrows), whereby *klp-6p::mCherry* was used as an IL2 neuron specific  
997 marker. Scale bars are 20  $\mu$ m.

998 **F** Quantification of GFP expression in transgenic animals carrying either the wild-type *Ex[cwp-*  
999 *4p::gfp]* promoter construct or the indicated promoter construct mutation. 20 worms per independent  
1000 transgenic line were examined. We determined in how many of the six IL2 neurons GFP expression  
1001 was detected.

1002

1003 **Figure 4- The gene isoform *daf-19m* is regulated by IL2 neuron terminal selectors and**  
1004 **comprises a regulatory subroutine with its downstream genes.**



1005 **A** Confocal images of *Ex[daf-19mp::gfp]* transgenic animals in a wild-type N2 background or in IL2  
1006 neuron terminal selector mutant, *unc-86(n846)* and *cfi-1(ky651)*, backgrounds. In every image, the  
1007 outer dotted line outlines the shape of the worm and the inner dotted line outlines parts of the pharynx.  
1008 IL2 neurons are indicated (arrows), whereby *klp-6p::mCherry* was used as an IL2 neuron specific  
1009 marker. Scale bars are 10  $\mu$ m.

1010 **B** Quantification of GFP expression in transgenic animals carrying *Ex[daf-19mp::gfp]* in the indicated  
1011 backgrounds. 20 worms per independent transgenic line were examined. We determined in how many  
1012 of the six IL2 neurons GFP expression was detected. Statistical significance was determined with one-  
1013 way ANOVA and Tukey's multiple comparison post-test. \*\*\*  $P \leq 0.001$ , significantly different from  
1014 the control. NS, not significant. Overall  $p$  value for ANOVA is less than 0.001 ( $P < 0.001$ ).

1015 **C** Confocal images of transgenic animals carrying promoter-to-GFP fusions of two IL2 neuron  
1016 identity genes: *lag-2p::gfp (qIs56)* and *unc-17p::gfp (vsIs48)* in a wild-type N2 and in a *daf-19m*  
1017 specific mutant background [*daf-19(n4132)*]. In every image, the outer dotted line outlines the shape  
1018 of the worm and the inner dotted line outlines parts of the pharynx. IL2 neurons are indicated  
1019 (arrows). Scale bars are 10  $\mu$ m.

1020 **D** Quantification of GFP expression in transgenic animals carrying promoter-to-GFP fusions of IL2  
1021 neuron identity genes (*lag-2*, *unc-17*) in the indicated backgrounds: wild type versus *daf-19m* specific  
1022 mutant [*daf-19(n4132)*]. 20 worms per independent transgenic line were examined for *lag-2p::gfp*,  
1023 while 7 and 11 worms, respectively, were examined for *unc-17p::gfp*. We determined in how many of  
1024 the six IL2 neurons GFP expression was detected. Statistical significance was determined with one-  
1025 way ANOVA and Tukey's multiple comparison post-test. NS, not significant. Overall  $p$  value for  
1026 ANOVA is 0.2169.

1027 **E** Confocal images of *Ex[daf-19mp::gfp]* transgenic animals carrying either a wild-type *daf-19m*  
1028 promoter construct or constructs where different candidate binding sites for IL2 neuron terminal  
1029 selector proteins, UNC-86 and CFI-1, have been mutated by substitution with poly-A sequences as  
1030 indicated (see also Fig EV4B). In every image, the dotted line outlines the shape of the worm. IL2  
1031 neurons are indicated (arrows), whereby *klp-6p::mCherry* was used as an IL2 neuron specific marker.  
1032 Solid-line ellipses indicate absent *daf-19mp::gfp* fluorescent signals in IL2 neurons marked by *klp-*  
1033 *6p::mCherry*. Scale bars are 20  $\mu$ m.

1034 **F** Quantification of GFP expression with strong intensity in transgenic animals carrying either a wild-  
1035 type *Ex[daf-19mp::gfp]* promoter construct or constructs with mutations of the indicated candidate  
1036 binding sites for IL2 neuron terminal selector proteins, UNC-86 and CFI-1. 20 worms per  
1037 independent transgenic line were examined. We determined in how many of the six IL2 neurons GFP  
1038 expression of mutated *daf-19m* promoter was detected with strong intensity, compared to wild-type  
1039 *Ex[daf-19mp::gfp]*. Statistical significance was determined with one-way ANOVA and Tukey's  
1040 multiple comparison post-test. \*\*\*  $P \leq 0.001$ , significantly different from the control. NS, not  
1041 significant. Overall  $p$  value for ANOVA is less than 0.001 ( $P < 0.001$ ).

1042

1043 **Figure 5- The *daf-19m* regulatory subroutine regulates *C. elegans* nictation behavior.**

1044 **A** Nictation ratios of wild-type N2, and the mutants *kfp-6(sy511)*, *daf-19(n4132)* – a *daf-19m* isoform  
1045 specific mutant, and *daf-19(tm5562)* – a *daf-19a/b* isoform specific mutant. Statistical significance  
1046 was determined with one-way ANOVA and Tukey's multiple comparison post-test. \*  $P \leq 0.5$ , \*\*  
1047  $P \leq 0.1$ , \*\*\*  $P \leq 0.001$ , significantly different from the control. NS, not significant. Overall  $p$  value for  
1048 ANOVA is less than 0.001 ( $P < 0.001$ ).

1049 **B** Nictation ratios of wild-type N2, and the mutants *him-5(e1490)*, and *daf-19(sm129)* – a mutant  
1050 where a splice acceptor site for the *daf-19m* isoform is disrupted – in a *him-5(e1490)* background.  
1051 Statistical significance was determined with one-way ANOVA and Tukey's multiple comparison  
1052 post-test. \*\*\*  $P \leq 0.001$ , significantly different from the control. Overall  $p$  value for ANOVA is less  
1053 than 0.001 ( $P < 0.001$ ).

1054 **C** Nictation ratios of wild-type N2, and the mutant *daf-19(n4132)* – a *daf-19m* isoform specific  
1055 mutant, and of transgenic lines expressing rescuing genomic DNA constructs of *osm-9*, *kfp-6*, and  
1056 *cwp-4*, downstream target genes of *daf-19m* functioning in IL2 neurons. Statistical significance was  
1057 determined with one-way ANOVA and Tukey's multiple comparison post-test. \*  $P \leq 0.5$ , \*\*\*  $P \leq 0.001$ ,  
1058 significantly different from the control. NS, not significant. Overall  $p$  value for ANOVA is less than  
1059 0.001.

1060 **D** Nictation ratios of wild-type N2, and mutants of *daf-19m* downstream target genes that are  
1061 expressed and functional in IL2 neurons: *cwp-4(tm727)*, *kfp-6(sy511)*, and *cil-7(tm5848)*; *kfp-6(ys71)*

1062 and *cil-7(tm5848); klp-6(ys72)*. Statistical significance was determined with one-way ANOVA and  
1063 Tukey's multiple comparison post-test. \*\*  $P \leq 0.1$ , significantly different from the control. NS, not  
1064 significant. Overall  $p$  value for ANOVA is 0.0058.

1065 **E** Nictation ratios of wild-type N2, and mutants of genes that are expressed and functional in IL2  
1066 neurons with previously demonstrated roles in IL2 sensory cilia exposed to the environment at the tip  
1067 of the head of the worm: *cil-7(tm5848)* and *osm-9(yz6)*. Statistical significance was determined with  
1068 one-way ANOVA and Tukey's multiple comparison post-test. \*\*\*  $P \leq 0.001$ , significantly different  
1069 from the control. NS, not significant. Overall  $p$  value for ANOVA is less than 0.001 ( $P < 0.001$ ).

1070

1071 **Figure 6- A model describing the importance of the *daf-19m* regulatory subroutine for IL2**  
1072 **neuron function.**

1073 **A** DAF-19M protein, regulated by IL2 neuron terminal selector proteins UNC-86 and CFI-1, controls  
1074 the expression of its target genes through an X-box promoter motif variant.

1075 **B** We have experimentally demonstrated that DAF-19M protein heads a regulatory subroutine that  
1076 comprises at least three (but very likely more) genes prominently expressed and functioning in IL2  
1077 neurons and their sensory cilia: *klp-6*, *osm-9*, and *cwp-4*.

1078 **C** The *daf-19m* regulatory subroutine controls nictation behavior through the function of IL2 neurons.  
1079 The KLP-6 kinesin transports proteins relevant and necessary for proper nictation to the ciliary tip of  
1080 IL2 neurons. IL2 sensory cilia are exposed to the environment at the tip of the worm's head.

1081

1082 **Expanded View Legends (Figures)**

1083

1084 **Figure Expanded View 1** *daf-19m* regulates *klp-6* expression in IL2 neurons at post-embryonic  
1085 stages, but is not important for the development of IL2 neurons.

1086 **A** Confocal images of animals with an *Is[klp-6p::gfp]* integrated transgene in different *daf-19* mutant  
1087 backgrounds: control – *jlls1900*, the integrated transgene carrying *klp-6p::gfp* and other markers not  
1088 relevant here; *daf-19(m86)* – the canonical null mutant; *daf-19(rh1024)* – a transposon *Tc1* derived  
1089 mutant; *daf-19(tm5562)* – a *daf-19a/b* isoform specific mutant. Both *daf-19(m86)* and *daf-19(rh1024)*  
1090 affect all *daf-19* isoforms including *daf-19m*, while in *daf-19(tm5562)* the *daf-19m* isoform remains  
1091 intact. In every image, the dotted line outlines the shape of the worm. IL2 neurons are indicated  
1092 (arrows). Scale bars are 20  $\mu$ m.

1093 **B** Confocal image of *Ex[F28A12.3p::gfp]* transgenic animals in a *daf-19(rh1024)* mutant background.  
1094 *F28A12.3* is an IL2 neuron specific gene whose expression is largely *daf-19* independent (Phirke et al,  
1095 2011). The dotted line outlines the shape of the worm. IL2 neurons are indicated (arrows). Scale bars  
1096 are 20  $\mu$ m.

1097 **C** Confocal images of *Ex[daf-19mp::gfp* and *klp-6p::mCherry]* transgenic animals in a wild-type N2  
1098 background at the L1 and dauer stages. Both stages are early juvenile developmental stages. In both  
1099 images, the dotted line outlines the shape of the worm. IL2 neurons are indicated (arrows). Scale bars  
1100 are 20  $\mu$ m.

1101

1102 **Figure Expanded View 2** The X-box motif variant residing in the *klp-6* promoter controls *klp-6*  
1103 expression not only in IL2 neurons but also in male specific neurons.

1104 **A** In *C. elegans* the canonical X-box promoter motif, an imperfect inverted repeat, consists of a 6-nt  
1105 5' half site (blue), a 2-nt spacer most often AT (black), and a 6-nt 3' half site (orange). *klp-6* promoter  
1106 sequence stretches strongly resembling these 5' or 3' half sites, respectively, are indicated. Distances  
1107 are given as upstream of the *klp-6* start codon ATG.

1108 **B** The X-box motif variant with a single nucleotide spacer (T) is conserved in the promoter of the IL2  
1109 neuron gene *klp-6* in *C. elegans* and in *klp-6* orthologs in other *Caenorhabditis* species: *Cbr* – *C.*  
1110 *briggsae*, *Cbn* – *C. brenneri*. Blue – X-box 5' half site, black – single nucleotide spacer (T), orange –  
1111 X-box 3' half site. Distances are given as upstream of the *klp-6* start codon ATG.

1112 **C** Confocal images of *Ex[klp-6p::gfp]* transgenic – male – animals carrying the indicated *klp-6*  
1113 promoter truncation construct in a wild-type N2 background identified the relevant *klp-6* promoter  
1114 region that controls both IL2 and male specific neuron expression. In every image, the dotted line  
1115 outlines the shape of the worm. IL2 and CEM neurons are indicated in the male head (arrows). HOB  
1116 and RnB neurons are indicated in the male tail (arrows). Scale bars are 20  $\mu$ m.

1117 **D** Confocal images of transgenic – male – animals carrying a tandem repeat of a *klp-6* X-box motif  
1118 variant minimal promoter region fused to GFP. The tandem repeat used consists of an extended X-box  
1119 motif variant (-628, -590). In both images, the dotted line outlines the shape of the worm. IL2 and  
1120 CEM neurons are indicated in the male head (arrows). HOB and RnB neurons are indicated in the  
1121 male tail (arrows). *klp-6p::mCherry* was used as the relevant neuron specific marker. Scale bars are  
1122 20  $\mu$ m.

1123

1124 **Figure Expanded View 3** The X-box motif variants residing in the *cwp-4* promoter control *cwp-4*  
1125 expression not only in IL2 neurons but also in male specific neurons.

1126 **A** The X-box motif variant is conserved in the promoter of the IL2 neuron gene *cwp-4* in *C. elegans*  
1127 and in *cwp-4* orthologs in other *Caenorhabditis* species: *Cbr* – *C. briggsae*, *Cre* – *C. remanei*, *Cbn* –  
1128 *C. brenneri*, *Cjp* – *C. japonica*. Blue – X-box 5' half site, black – spacer nucleotide, orange – X-box  
1129 3' half site. Distances are given as upstream of the *cwp-4* start codon ATG.

1130 **B** Confocal images of *Ex[cwp-4p::gfp]* transgenic – male – animals carrying the indicated *cwp-4*  
1131 promoter mutation construct in a wild-type N2 background identified the relevant *cwp-4* promoter  
1132 region that controls both IL2 and male specific neuron expression. The *cwp-4* promoter mutation  
1133 consisted of substituting both X-box motif variant sequences (-90 to -78 and -68 to -56) with  
1134 GGATCC C GGATCC. In every image, the dotted line outlines the shape of the worm. IL2 and CEM

1135 neurons are indicated in the male head (arrows). HOB and RnB neurons are indicated in the male tail  
1136 (arrows). *klp-6p::mCherry* was used as the relevant neuron specific marker. Scale bars are 20  $\mu$ m.

1137 **C** Confocal images of *Ex[cwp-4p::gfp* and *klp-6p::mCherry]* transgenic animals in a wild-type N2  
1138 background at the L1 and dauer stages. Both stages are early juvenile developmental stages. In both  
1139 images, the dotted line outlines the shape of the worm. IL2 neurons are indicated (arrows). Scale bars  
1140 are 20  $\mu$ m.

1141

1142 **Figure Expanded View 4** Schematics of **A** *daf-19* gene organization and constructs for *daf-19*  
1143 isoform specific rescue experiments; and **B** *daf-19m* isoform promoter variants (wild type and specific  
1144 substitutions) for investigating candidate IL2 neuron terminal selector protein binding sites.

1145 **A** All the constructs for *daf-19* isoform specific rescue experiments are genomic DNA based with the  
1146 exception of *pGG67*. *pGG67* is a fusion construct consisting of genomic DNA (exons 1-3) and  
1147 complementary DNA (exons 3-12) for *daf-19a* isoform specific rescue (Senti & Swoboda, 2008).  
1148 *pGG14* is a genomic DNA construct for *daf-19c* isoform specific rescue (Senti & Swoboda, 2008).  
1149 *pJL1920* is a genomic DNA construct for *daf-19c* isoform specific rescue with the deletion of the  
1150 HOB/RnB element (Wang et al, 2010). *pJL1921* is a genomic DNA construct for *daf-19m* isoform  
1151 specific rescue that includes a 5' fusion of the IL2/CEM enhancer element (Wang et al, 2010).

1152 **B** The *daf-19m* promoter contains candidate binding sites for IL2 neuron terminal selector proteins,  
1153 UNC-86 and CFI-1. Mutagenesis constructs eliminate candidate binding sites for UNC-86  
1154 (Substitution -761, -739), for both UNC-86 and CFI-1 (Substitution -601, -566), and for CFI-1  
1155 (Substitution -132, -116).

1156

1157 **Expanded View Legends (Tables)**

1158

1159 **Table Expanded View 1** A yeast-1-hybrid experiment with the isolated *klp-6* cis-regulatory element  
1160 as bait confirmed DAF-19 as its binding protein. We list the identity and numbers of yeast-1-hybrid  
1161 clones that showed positive interaction between bait sequence and protein, as translated from a *C.*  
1162 *elegans* cDNA library. All clones were examined and confirmed by PCR. In addition, some clones  
1163 were sequenced for detailed binding site information.

1164

1165 **Table Expanded View 2** The list of *C. elegans* genes used for constructing a position weight matrix  
1166 (PWM) for the canonical X-box motif. All genes were previously shown to harbor an X-box motif in  
1167 their promoters (Blacque et al, 2005; Efimenko et al, 2005; Chen et al, 2006; Burghoorn et al, 2012).  
1168 Available gene orthologs in other *Caenorhabditis* species (*C. briggsae* and *C. remanei*) were  
1169 extracted from Wormbase (WS235; [www.wormbase.org](http://www.wormbase.org)). The column Position describes the distance  
1170 of the X-box motif upstream of position +1 of the start codon ATG.

1171

1172 **Table Expanded View 3** The list of *C. elegans* genes used for constructing a position weight matrix  
1173 (PWM) for candidate X-box motif variants. Some of the genes were previously shown to harbor an X-  
1174 box motif in their promoters (Blacque et al, 2005; Efimenko et al, 2005; Chen et al, 2006; Burghoorn  
1175 et al, 2012), whereby we have added a number of genes expressed and functional in IL2 neurons  
1176 including *klp-6*, *cwp-4*, *tat-6*, and *spg-20*. Available gene orthologs in other *Caenorhabditis* species  
1177 (*C. briggsae*, *C. remanei*, *C. brenneri*) were extracted from Wormbase (WS235;  
1178 [www.wormbase.org](http://www.wormbase.org)). The column Position describes the distance of the X-box motif upstream of  
1179 position +1 of the start codon ATG.

1180

1181 **Table Expanded View 4** A list of candidates for DAF-19M downstream target genes that harbor X-  
1182 box motif variant hits with a single nucleotide spacer (candidate 13 nt X-box hits). Searches in *C.*  
1183 *elegans* were carried out genome-wide. All sequence hits were extracted using FIMO (Find Individual



1184 Motif Occurrences; <http://meme-suite.org/tools/fimo>) based on a position weight matrix (Table EV3)  
1185 that allowed for any single nucleotide spacer (N). The FIMO search parameter p-value was required  
1186 to be smaller than 1E-04. All sequence hits listed were found to locate within 1 kb upstream or  
1187 downstream of position +1 of the start codon ATG of the respective gene (column *Location*). We have  
1188 observed X-box motif sequence hits on both strands as indicated (\*).

1189

1190 **Table Expanded View 5** A list of candidates for DAF-19M downstream target genes that harbor X-  
1191 box motif variant hits with a double nucleotide spacer (candidate 14 nt X-box hits). Searches in *C.*  
1192 *elegans* were carried out genome-wide. All sequence hits were extracted using FIMO (Find Individual  
1193 Motif Occurrences; <http://meme-suite.org/tools/fimo>) based on a position weight matrix (Table EV3)  
1194 that allowed for any double nucleotide spacer (NN). The FIMO search parameter p-value was  
1195 required to be smaller than 1E-04. All sequence hits listed were found to locate within 1 kb upstream  
1196 or downstream of position +1 of the start codon ATG of the respective gene (column *Location*). We  
1197 have observed X-box motif sequence hits on both strands as indicated (\*). We have found X-box  
1198 motif sequence hits located only on the (-) strand, while previous studies reported corresponding hits  
1199 on the (+) strand, as indicated (\*\*). In the case of the gene *nud-1*, Wormbase (WS235;  
1200 [www.wormbase.org](http://www.wormbase.org)) has revised the X-box promoter motif sequence from GTATCC AT GAAAAC  
1201 (Efimenko et al, 2005) to GTATCC AT GGGAAC, as indicated (\*\*\*)). In this table X-box motif  
1202 sequence hits that have been reported in previous studies are indicated in **bold**.

1203

1204 **Table Expanded View 6** A list of candidates for DAF-19M downstream target genes that harbor X-  
1205 box motif variant hits with a triple nucleotide spacer (candidate 15 nt X-box hits). Searches in *C.*  
1206 *elegans* were carried out genome-wide. All sequence hits were extracted using FIMO (Find Individual  
1207 Motif Occurrences; <http://meme-suite.org/tools/fimo>) based on a position weight matrix (Table EV3)  
1208 that allowed for any triple nucleotide spacer (NNN). The FIMO search parameter p-value was  
1209 required to be smaller than 1E-04. All sequence hits listed were found to locate within 1 kb upstream  
1210 or downstream of position +1 of the start codon ATG of the respective gene (column *Location*). We  
1211 have observed X-box motif sequence hits on both strands as indicated (\*).

1212

1213 **Table Expanded View 7** List of *C. elegans* strains used in this study. The wild-type strain is Bristol  
1214 N2. All strains used and listed in this Table are derived from this wild-type N2 background. The  
1215 strains LJ896, LJ897 and LJ898 are marked with a single asterisk (\*): they carry mutations that were  
1216 originally received from other sources in a *him-5* mutant background (*cwp-4*: Douglas Portman lab;  
1217 *daf-19*: Bob Horvitz lab; *klp-6*: CGC). We have removed the *him-5* mutant background by outcrossing  
1218 with wild-type N2. The strain LJ899 is marked with a double asterisk (\*\*): it carries the *cil-7(tm5848)*  
1219 mutant allele after outcrossing with wild-type N2. We have originally received *cil-7(tm5848)* un-  
1220 outcrossed from the National BioResource Project (Japan).

# Figure 1

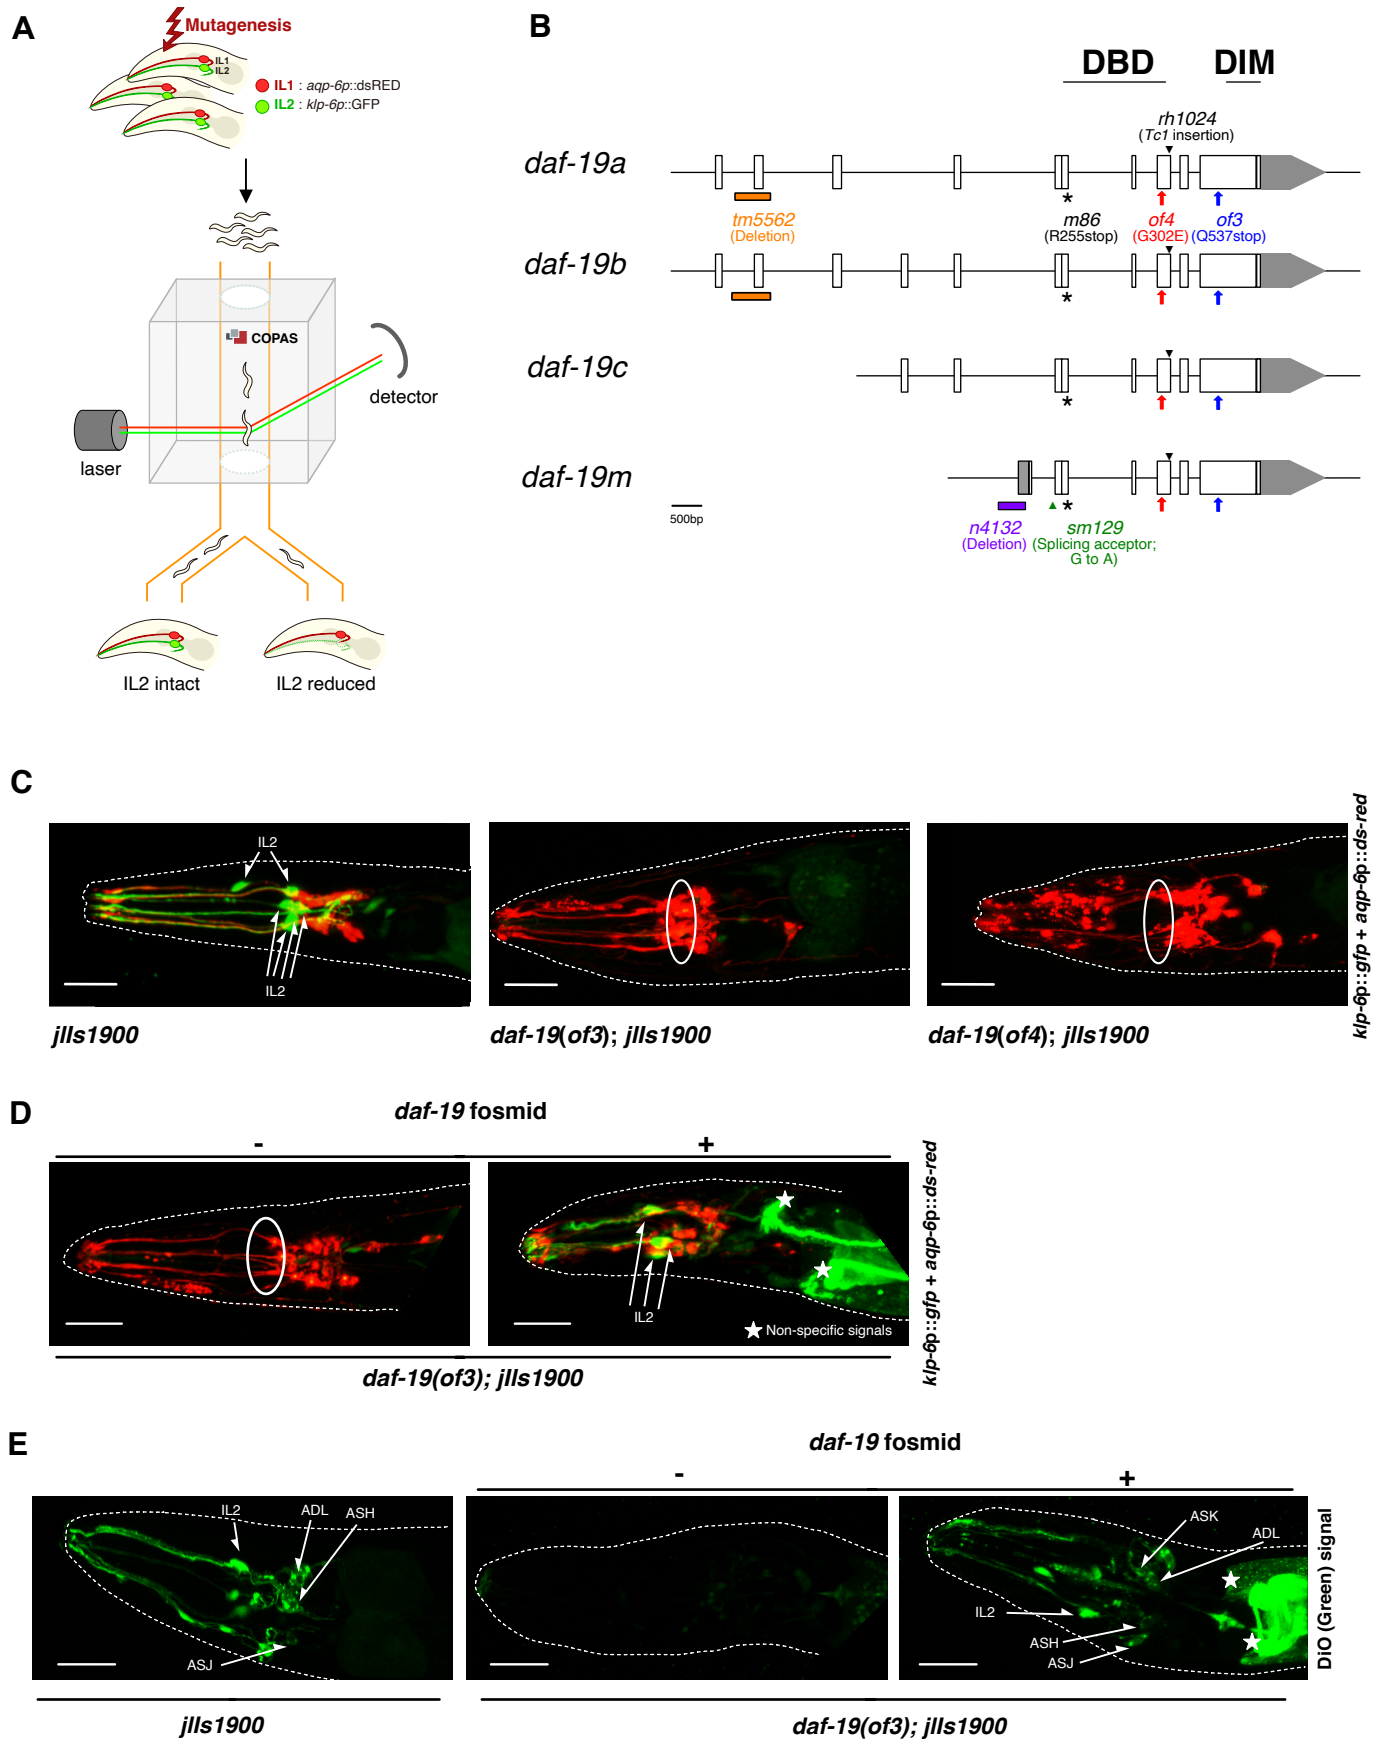

A

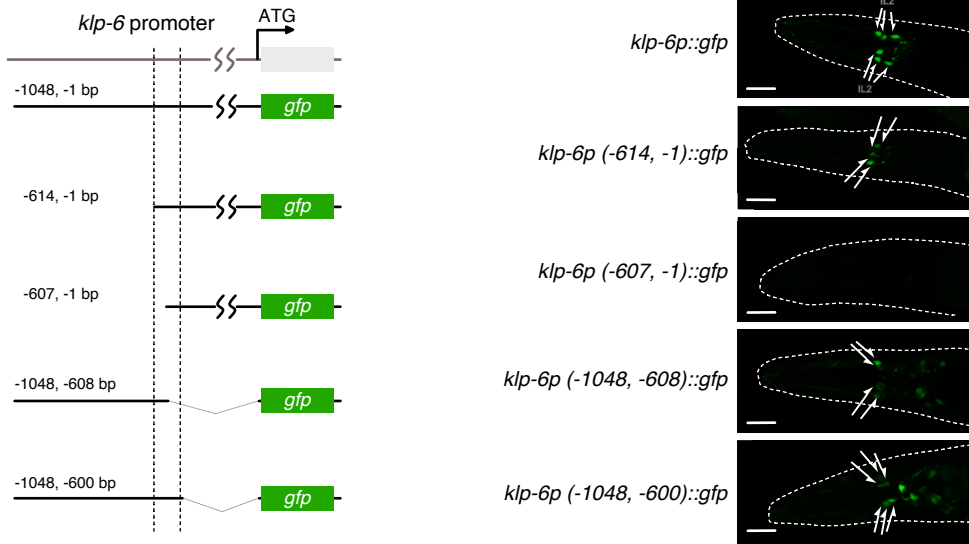

B

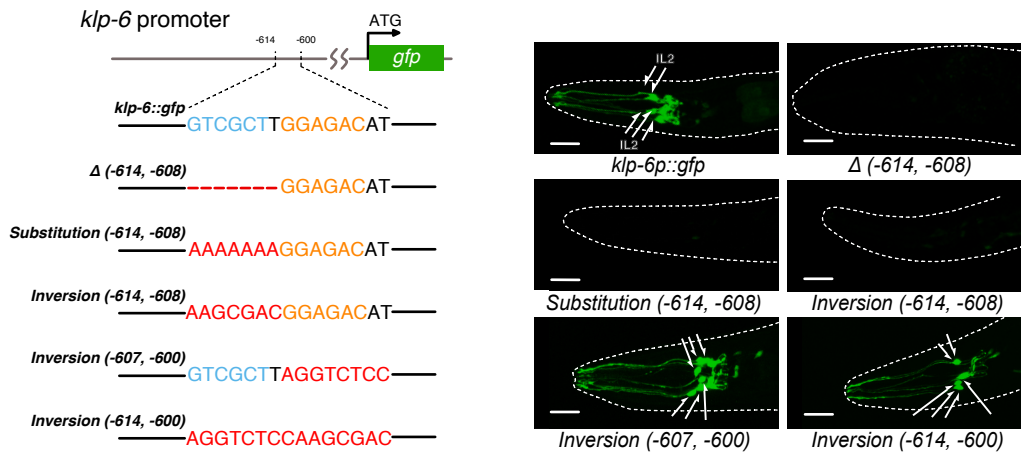

C

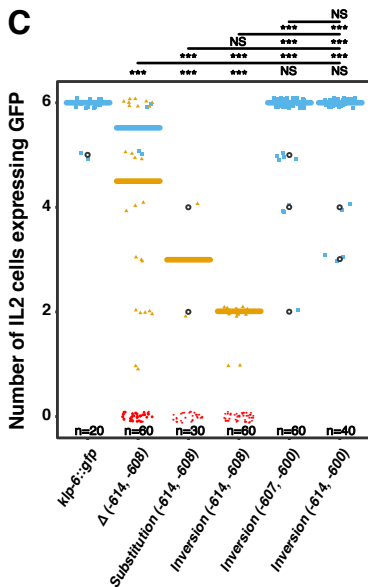

D

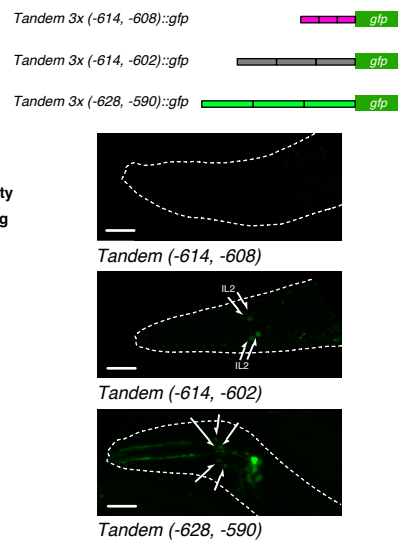

E

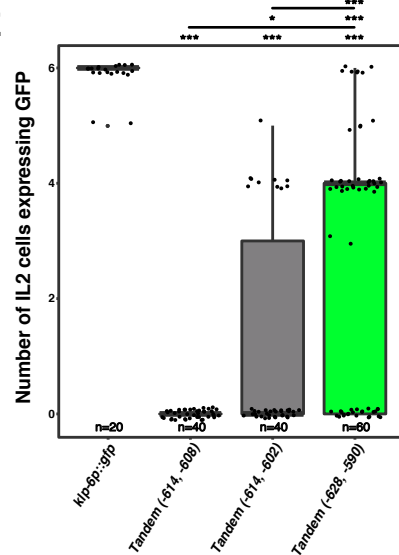

# Figure 3

bioRxiv preprint doi: <https://doi.org/10.1101/2021.02.03.429678>; this version posted February 4, 2021. The copyright holder for this preprint (which was not certified by peer review) is the author/funder, who has granted bioRxiv a license to display the preprint in perpetuity. It is made available under aCC-BY-NC-ND 4.0 International license.

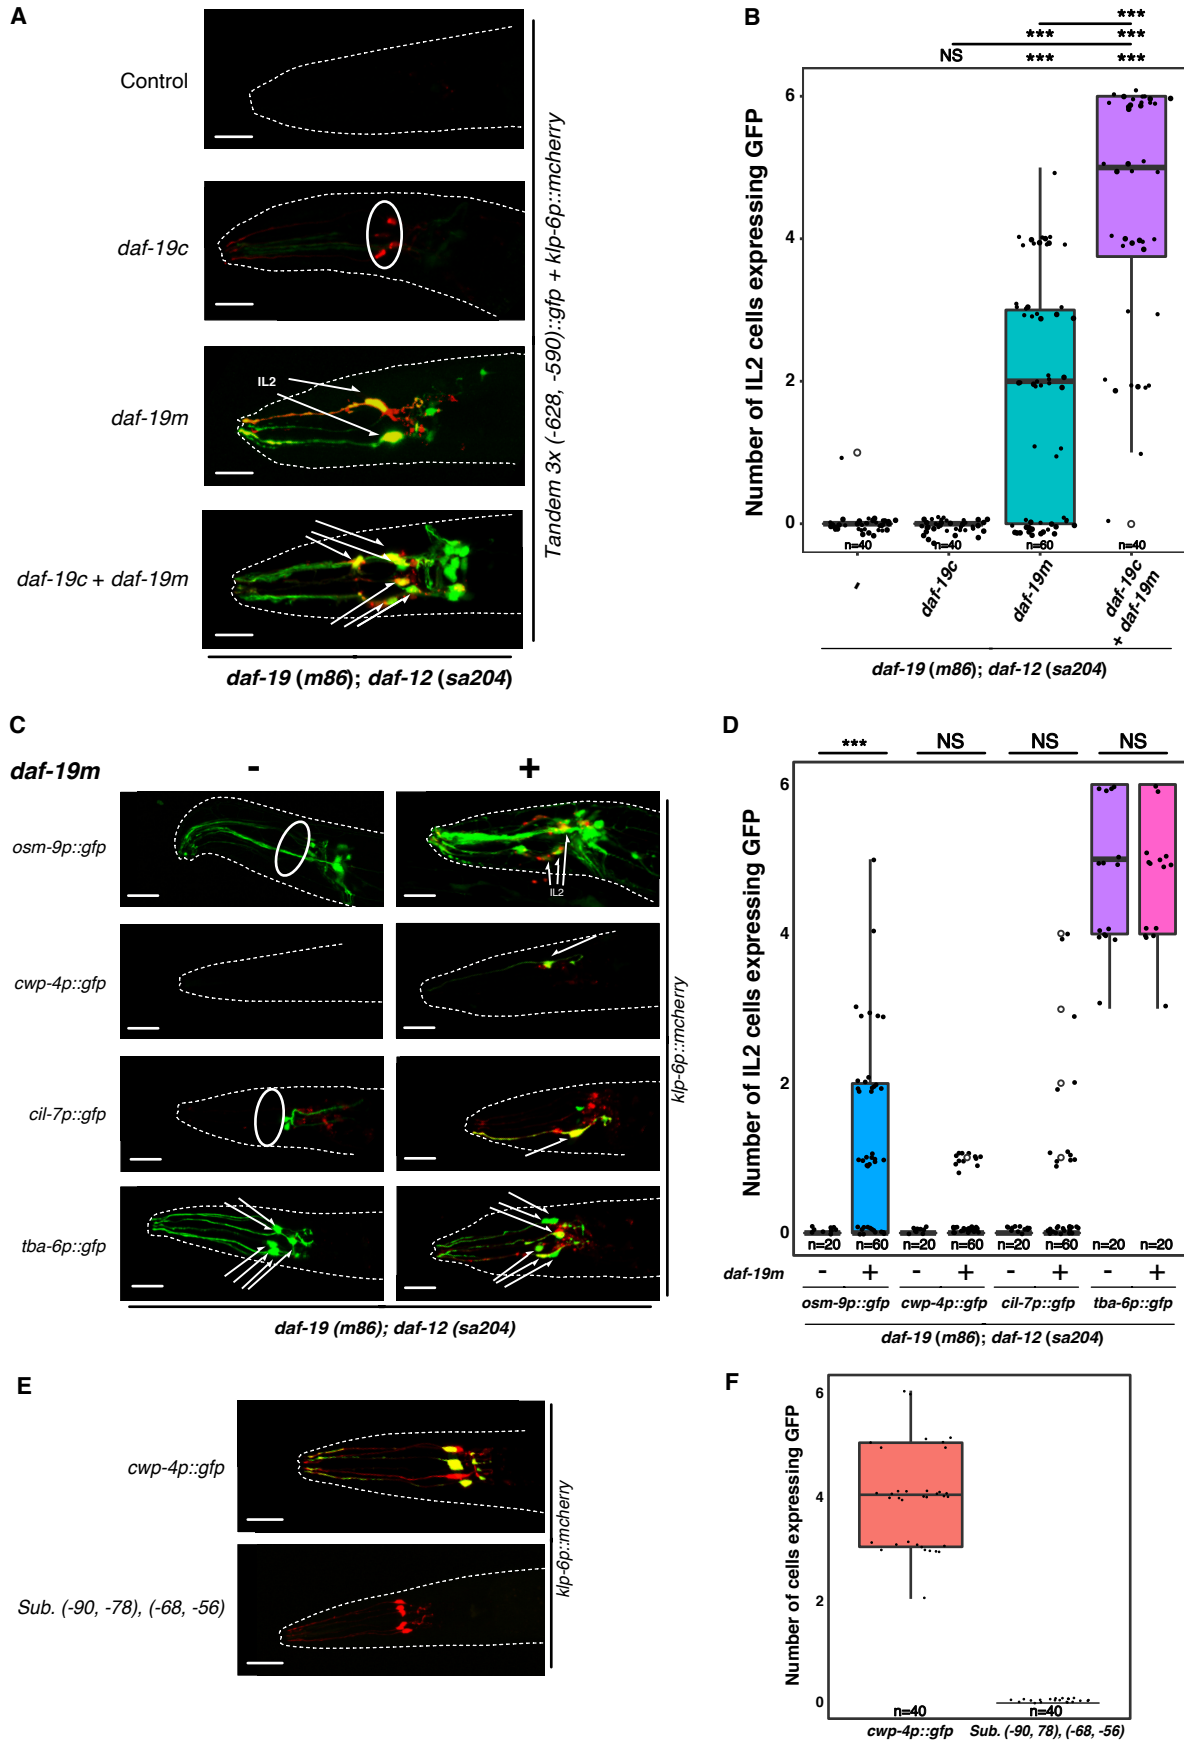

# Figure 4

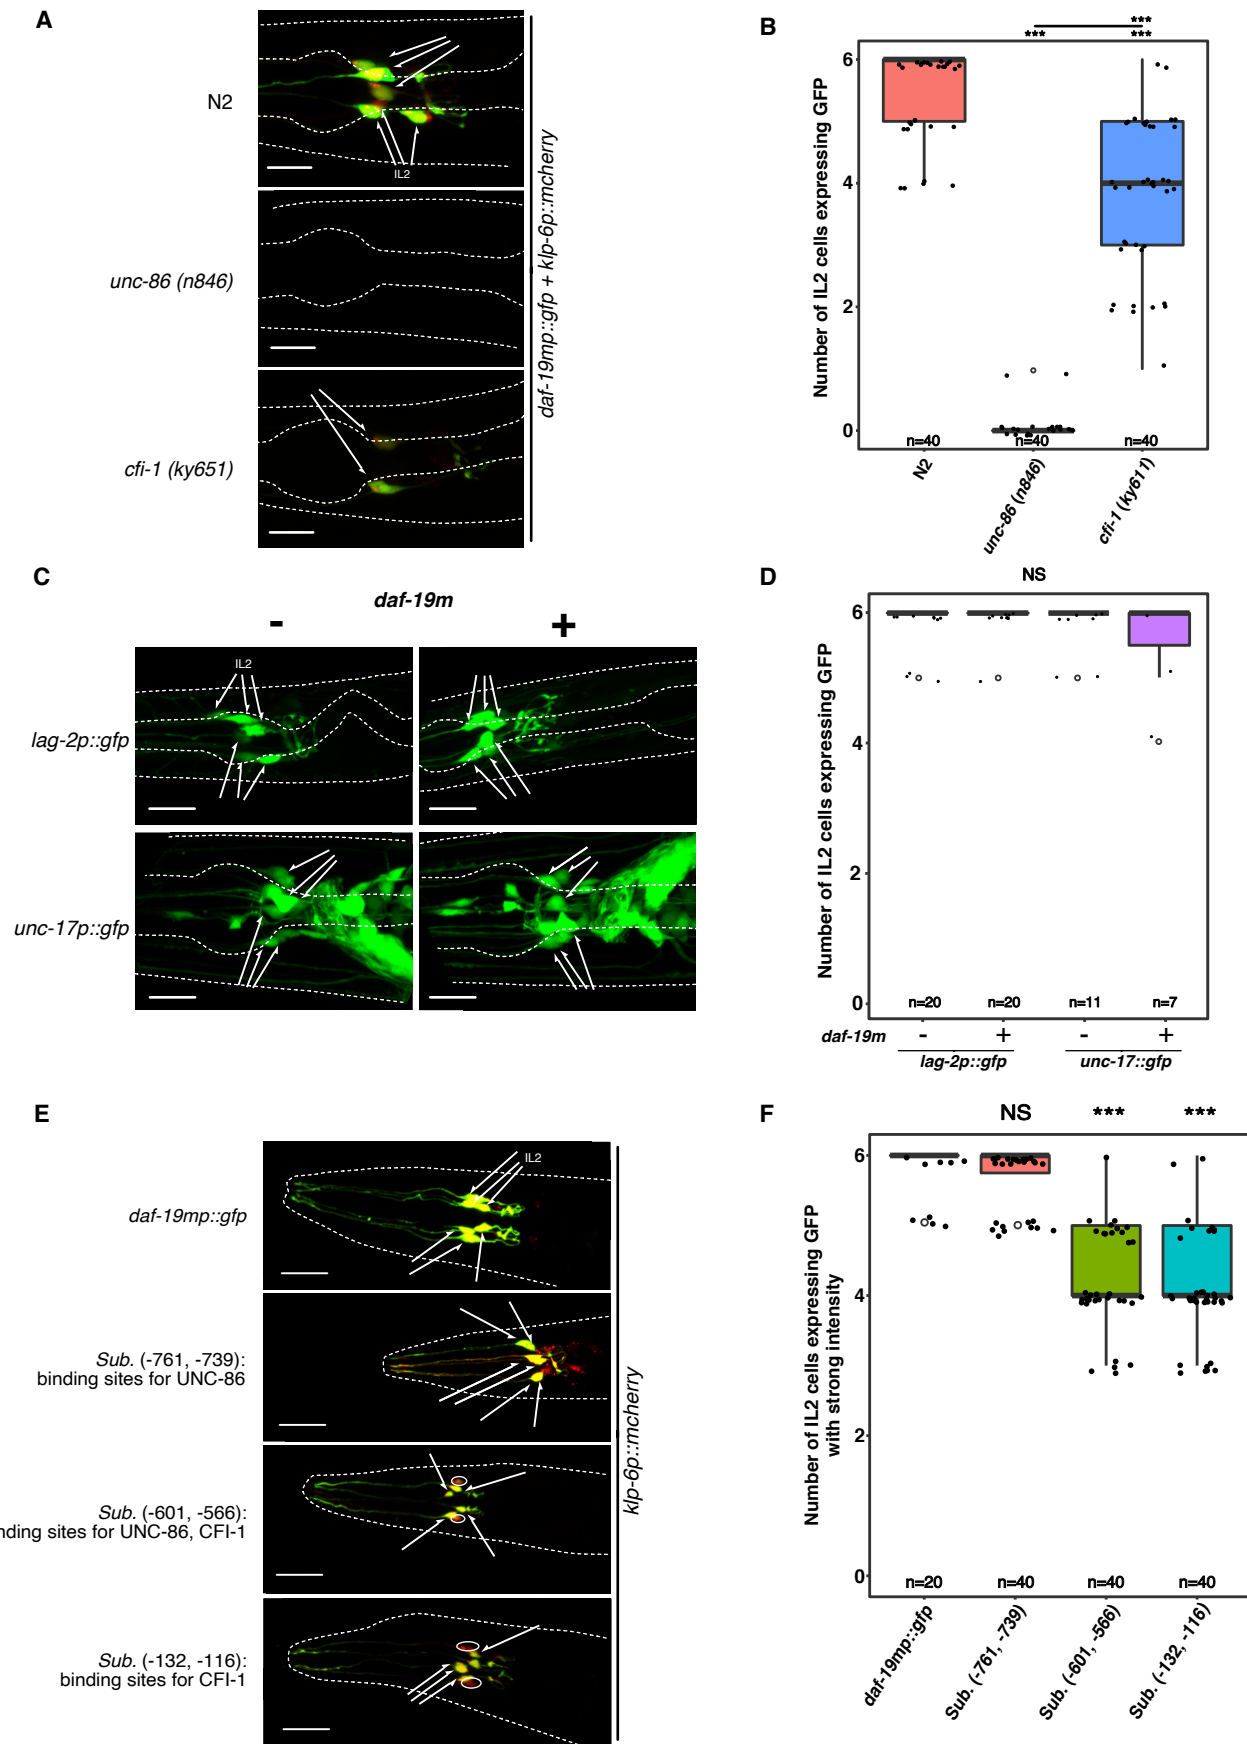

# Figure 5

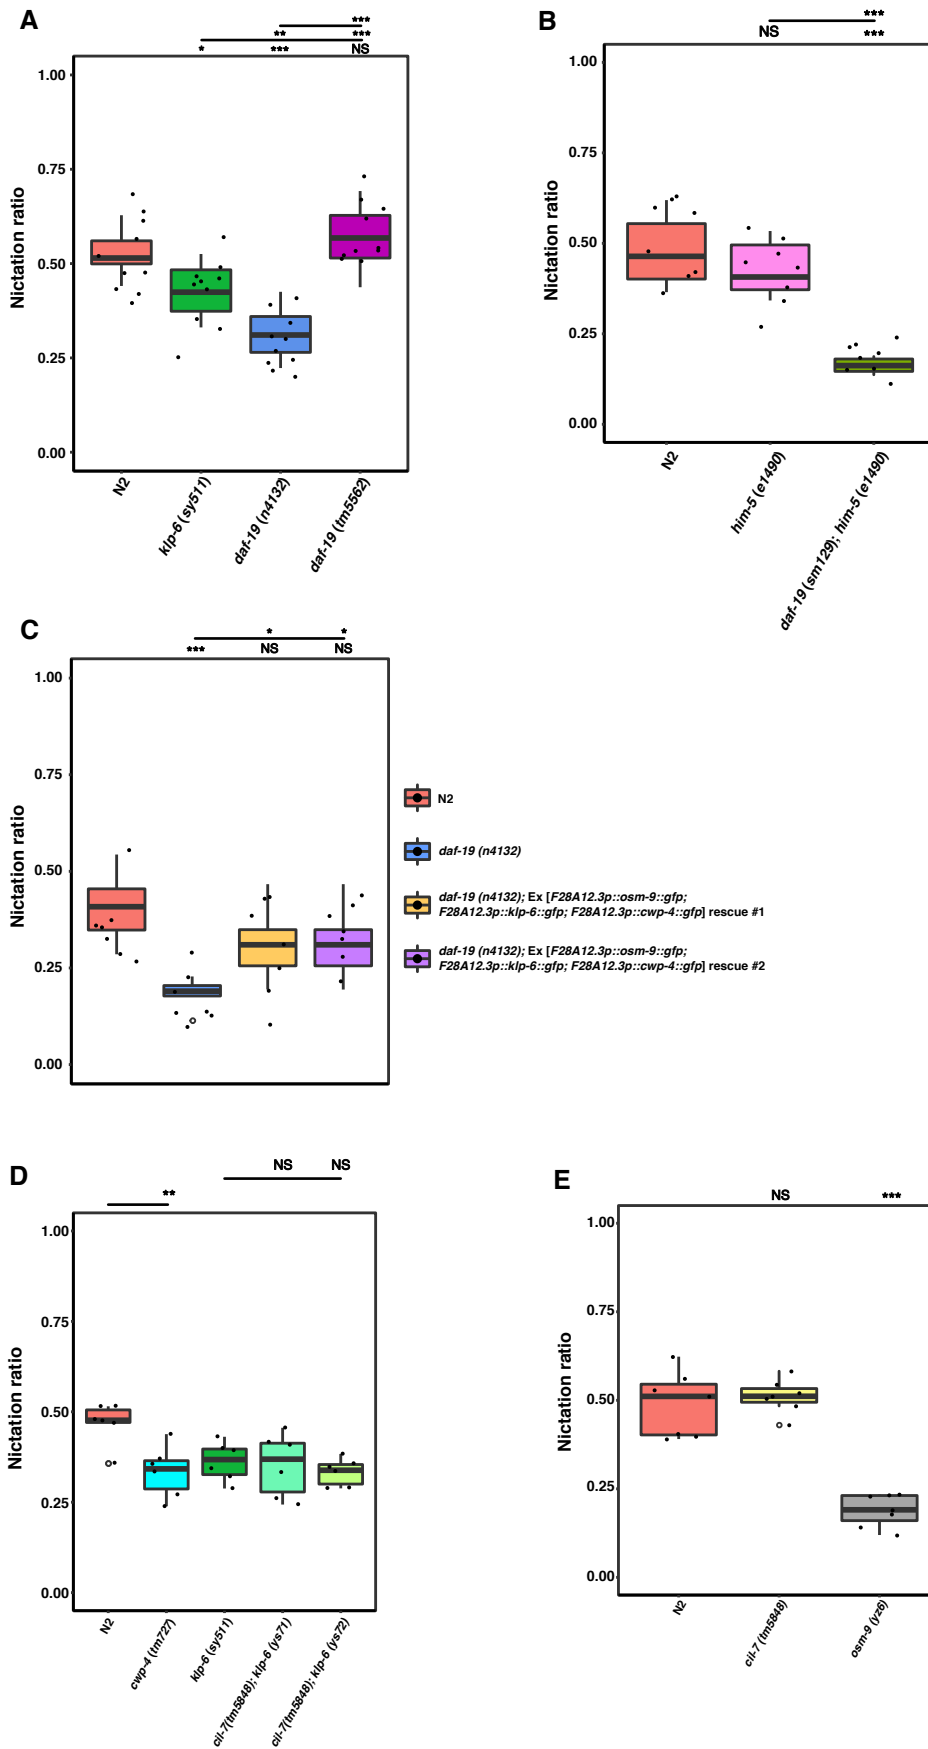



# Figure 6

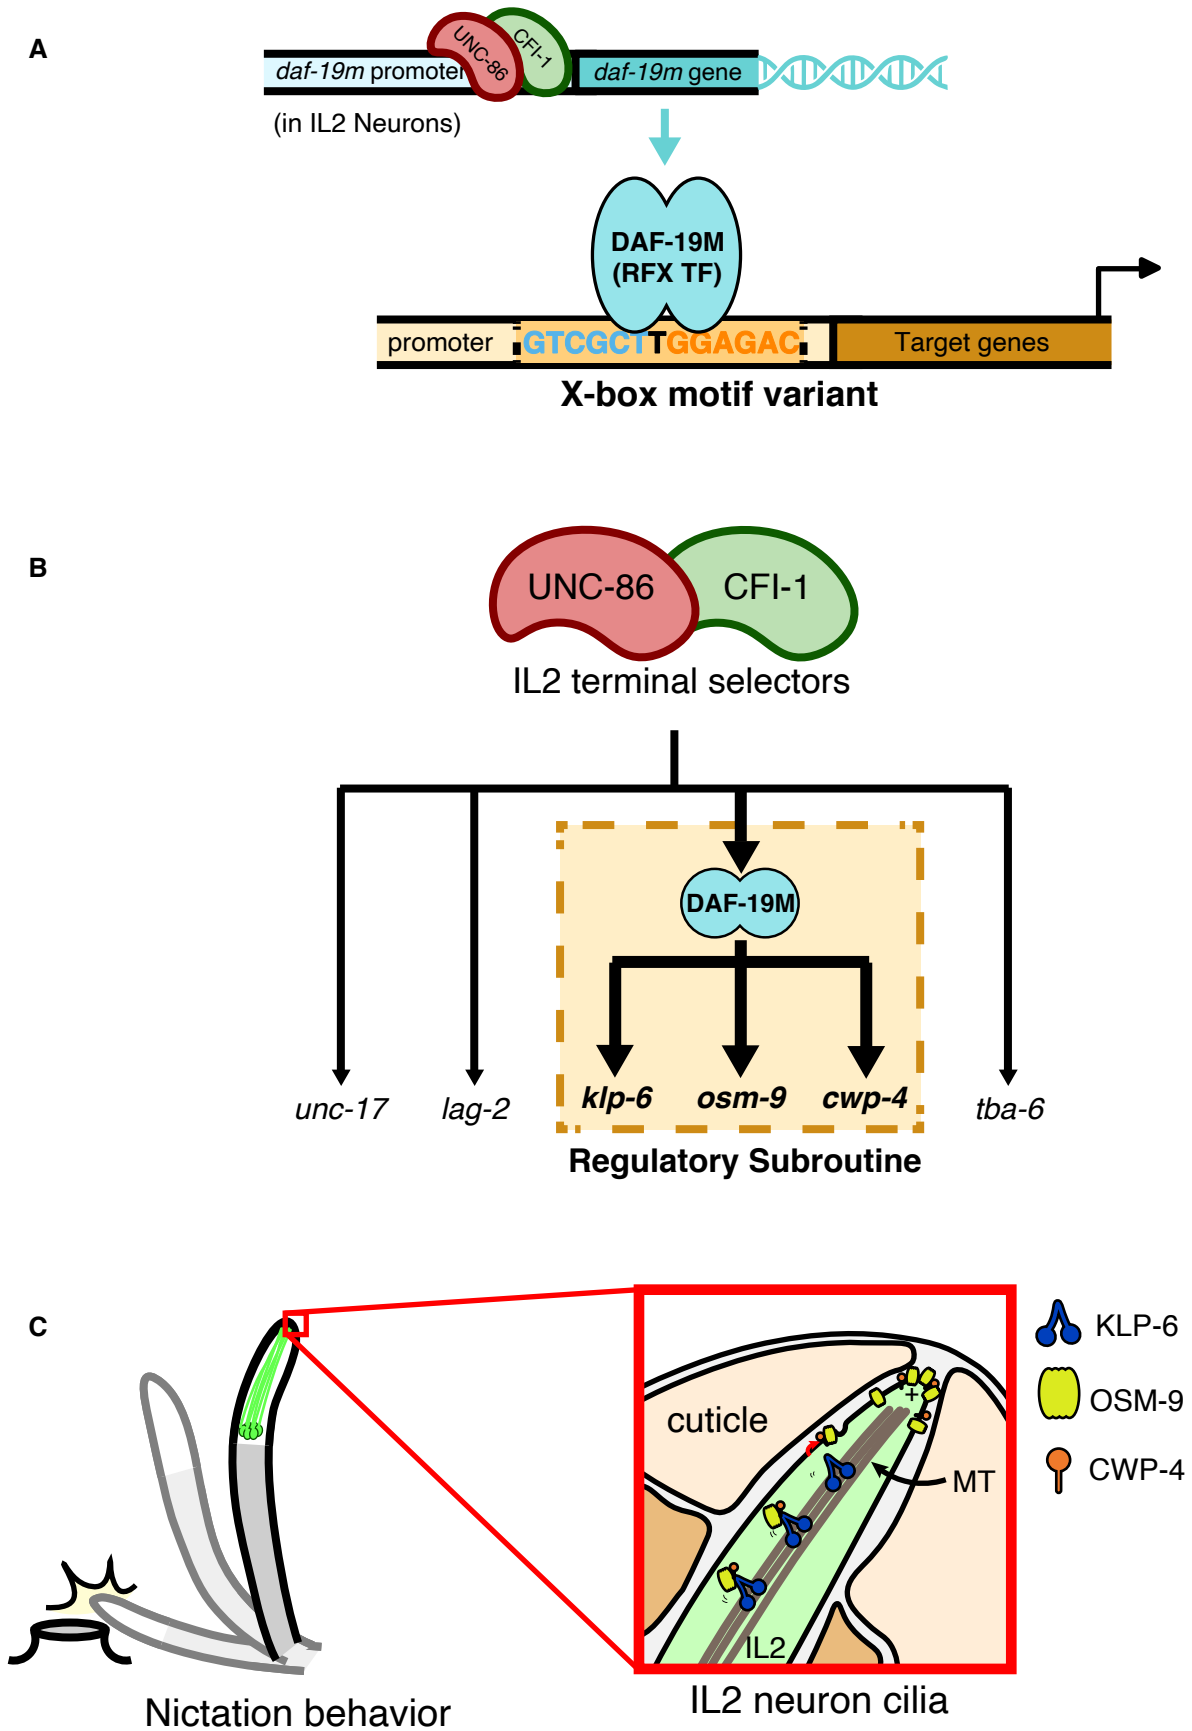

Source: https://biorxiv.org/content/10.1101/2021.02.03.429678v1.full.pdf
